# Supplementary material for: Antimicrobial use through consumption of medicated feeds in chicken flocks in the Mekong Delta of Vietnam: A three-year study before a ban on antimicrobial growth promoters
Source: PLoS One. 2021 Apr 22;16(4):e0250082. doi: 10.1371/journal.pone.0250082 (PMC8061946; doi:10.1371/journal.pone.0250082)
Supplement: S1 Data — (XLSX) [file pone.0250082.s002.xlsx]

## Sheet: feed_data
Farm	Flock	District	Week	Number_chicken	Weight_flock	FE001	FE002	FE004	FE005	FE006	FE007	FE011	FE013	FE015	FE017	FE019	FE023	FE024	FE025	FE026	FE033	FE036	FE037	FE040	FE042	FE043	FE045	FE047	FE048	FE053	FE055	FE058	FE059	FE066	FE067	FE074	FE080	FE090	FE094	FE104	enramycin_low (mg/kg chicken)	enramycin_high (mg/kg chicken)	avilamycin_low (mg/kg chicken)	avilamycin_high (mg/kg chicken)	oxytetracyline_low (mg/kg chicken)	oxytetracyline_high (mg/kg chicken)	bacitracin_low (mg/kg chicken)	bacitracin_high (mg/kg chicken)	chlortetracycline_low (mg/kg chicken)
75-001	75-001_1	Thap Muoi	1	210	10.5	0.81																																			0.77	0.77
75-001	75-001_1	Thap Muoi	2	207	18.63	2.59																																			1.39	1.39
75-001	75-001_1	Thap Muoi	3	207	51.75	9.99																																			1.93	1.93
75-001	75-001_1	Thap Muoi	4	206	88.58		21.79																																		2.46	2.46
75-001	75-001_1	Thap Muoi	5	206	109.18		31.99																																		2.93	2.93
75-001	75-001_1	Thap Muoi	6	206	129.78		40.1																																		3.09	3.09
75-001	75-001_1	Thap Muoi	7	204	140.76
75-001	75-001_1	Thap Muoi	8	204	150.96
75-001	75-001_1	Thap Muoi	9	202	167.66
75-001	75-001_1	Thap Muoi	10	202	183.82
75-001	75-001_1	Thap Muoi	11	196	196
75-001	75-001_1	Thap Muoi	12	196	223.44
75-001	75-001_1	Thap Muoi	13	196	258.72
75-001	75-001_1	Thap Muoi	14	182	254.8			123.58																																	4.85	4.85
75-001	75-001_1	Thap Muoi	15	175	248.5
75-001	75-001_1	Thap Muoi	16	162	244.62
75-001	75-001_1	Thap Muoi	17	157	244.92
75-001	75-001_1	Thap Muoi	18	157	251.2
75-001	75-001_1	Thap Muoi	19	146	246.74		140.15																																		5.68	5.68
75-001	75-001_1	Thap Muoi	20	140	247.8
75-001	75-001_1	Thap Muoi	21	140	253.4
75-001	75-001_1	Thap Muoi	22	130	241.8
75-001	75-001_1	Thap Muoi	23	110	212.3
75-001	75-001_1	Thap Muoi	24	90	180
75-001	75-001_1	Thap Muoi	25	78	163.8
75-001	75-001_1	Thap Muoi	26	68	146.2
75-001	75-001_1	Thap Muoi	27	38	83.6
75-001	75-001_2	Thap Muoi	1	204	10.2	0.79																																			0.77	0.77
75-001	75-001_2	Thap Muoi	2	203	18.27	2.54																																			1.39	1.39
75-001	75-001_2	Thap Muoi	3	202	50.5	9.75																																			1.93	1.93
75-001	75-001_2	Thap Muoi	4	202	86.86			21.37																																	2.46	2.46
75-001	75-001_2	Thap Muoi	5	202	107.06			31.37																																	2.93	2.93
75-001	75-001_2	Thap Muoi	6	152	95.76			29.59																																	3.09	3.09
75-001	75-001_2	Thap Muoi	7	152	104.88			33.46																																	3.19	3.19
75-001	75-001_2	Thap Muoi	8	150	111			38.52																																	3.47	3.47
75-001	75-001_2	Thap Muoi	9	150	124.5			46.56																																	3.74	3.74
75-001	75-001_2	Thap Muoi	10	150	136.5
75-001	75-001_2	Thap Muoi	11	150	150
75-001	75-001_2	Thap Muoi	12	139	158.46
75-001	75-001_2	Thap Muoi	13	139	183.48
75-001	75-001_2	Thap Muoi	14	139	194.6
75-001	75-001_2	Thap Muoi	15	133	188.86
75-001	75-001_2	Thap Muoi	16	133	200.83
75-001	75-001_2	Thap Muoi	17	123	191.88
75-001	75-001_2	Thap Muoi	18	113	180.8
75-001	75-001_2	Thap Muoi	19	90	152.1
75-001	75-001_2	Thap Muoi	20	90	159.3
75-001	75-001_2	Thap Muoi	21	90	162.9
75-001	75-001_2	Thap Muoi	22	90	167.4
75-001	75-001_2	Thap Muoi	23	90	173.7
75-001	75-001_2	Thap Muoi	24	70	140
75-001	75-001_3	Thap Muoi	1	202	10.1	0.78																																			0.77	0.77
75-001	75-001_3	Thap Muoi	2	200	18	2.5																																			1.39	1.39
75-001	75-001_3	Thap Muoi	3	200	50	9.65																																			1.93	1.93
75-001	75-001_3	Thap Muoi	4	148	63.64	15.66																																			2.46	2.46
75-001	75-001_3	Thap Muoi	5	148	78.44			22.98																																	2.93	2.93
75-001	75-001_3	Thap Muoi	6	148	93.24			28.81																																	3.09	3.09
75-001	75-001_3	Thap Muoi	7	132	91.08			29.05																																	3.19	3.19
75-001	75-001_3	Thap Muoi	8	124	91.76			31.84																																	3.47	3.47
75-001	75-001_3	Thap Muoi	9	124	102.92
75-001	75-001_3	Thap Muoi	10	123	111.93
75-001	75-001_3	Thap Muoi	11	123	123
75-001	75-001_3	Thap Muoi	12	123	140.22
75-001	75-001_3	Thap Muoi	13	123	162.36
75-001	75-001_3	Thap Muoi	14	123	172.2
75-001	75-001_3	Thap Muoi	15	123	174.66
75-001	75-001_3	Thap Muoi	16	123	185.73
75-001	75-001_3	Thap Muoi	17	120	187.2
75-001	75-001_3	Thap Muoi	18	60	96
75-001	75-001_4	Thap Muoi	1	240	12	0.92																																			0.77	0.77
75-001	75-001_4	Thap Muoi	2	240	21.6	3																																			1.39	1.39
75-001	75-001_4	Thap Muoi	3	240	60																																				1.93	1.93
75-001	75-001_4	Thap Muoi	4	240	103.2																																				2.46	2.46
75-001	75-001_4	Thap Muoi	5	238	126.14			36.96																																	2.93	2.93
75-001	75-001_4	Thap Muoi	6	236	148.68			45.94																																	3.09	3.09
75-001	75-001_4	Thap Muoi	7	232	160.08			51.07																																	3.19	3.19
75-001	75-001_4	Thap Muoi	8	232	171.68			59.57																																	3.47	3.47
75-001	75-001_4	Thap Muoi	9	227	188.41			70.47																																	3.74	3.74
75-001	75-001_4	Thap Muoi	10	220	200.2			80.48																																	4.02	4.02
75-001	75-001_4	Thap Muoi	11	210	210			88.83																																	4.23	4.23
75-001	75-001_4	Thap Muoi	12	203	231.42			102.75																																	4.44	4.44
75-001	75-001_4	Thap Muoi	13	203	267.96			124.33																																	4.64	4.64
75-001	75-001_4	Thap Muoi	14	203	284.2
75-001	75-001_4	Thap Muoi	15	203	288.26			147.88																																	5.13	5.13
75-001	75-001_4	Thap Muoi	16	203	306.53
75-001	75-001_4	Thap Muoi	17	130	202.8
75-001	75-001_4	Thap Muoi	18	85	136
75-001	75-001_4	Thap Muoi	19	85	143.65
75-001	75-001_4	Thap Muoi	20	85	150.45
75-001	75-001_5	Thap Muoi	1	300	15	1.16																																			0.77	0.77
75-001	75-001_5	Thap Muoi	2	300	27	3.75																																			1.39	1.39
75-001	75-001_5	Thap Muoi	3	300	75	14.48																																			1.93	1.93
75-001	75-001_5	Thap Muoi	4	300	129	31.73																																			2.46	2.46
75-001	75-001_5	Thap Muoi	5	299	158.47																																				2.93	2.93
75-001	75-001_5	Thap Muoi	6	290	182.7			56.45																																	3.09	3.09
75-001	75-001_5	Thap Muoi	7	284	195.96			62.51																																	3.19	3.19
75-001	75-001_5	Thap Muoi	8	284	210.16			72.93																																	3.47	3.47
75-001	75-001_5	Thap Muoi	9	283	234.89			87.85																																	3.74	3.74
75-001	75-001_5	Thap Muoi	10	283	257.53			103.53																																	4.02	4.02
75-001	75-001_5	Thap Muoi	11	283	283			119.71																																	4.23	4.23
75-001	75-001_5	Thap Muoi	12	280	319.2			141.72																																	4.44	4.44
75-001	75-001_5	Thap Muoi	13	280	369.6			171.49																																	4.64	4.64
75-001	75-001_5	Thap Muoi	14	280	392			190.12																																	4.85	4.85
75-001	75-001_5	Thap Muoi	15	260	369.2			189.4																																	5.13	5.13
75-001	75-001_5	Thap Muoi	16	59	89.09
75-001	75-001_5	Thap Muoi	17	40	62.4
75-001	75-001_6	Thap Muoi	1	204	10.2	0.79																																			0.77	0.77
75-001	75-001_6	Thap Muoi	2	195	17.55	2.44																																			1.39	1.39
75-001	75-001_6	Thap Muoi	3	195	48.75	9.41																																			1.93	1.93
75-001	75-001_6	Thap Muoi	4	190	81.7	20.1																																			2.46	2.46
75-001	75-001_6	Thap Muoi	5	189	100.17																																				2.93	2.93
75-001	75-001_6	Thap Muoi	6	176	110.88			34.26																																	3.09	3.09
75-001	75-001_6	Thap Muoi	7	165	113.85			36.32																																	3.19	3.19
75-001	75-001_6	Thap Muoi	8	165	122.1			42.37																																	3.47	3.47
75-001	75-001_6	Thap Muoi	9	162	134.46			50.29																																	3.74	3.74
75-001	75-001_6	Thap Muoi	10	162	147.42			59.26																																	4.02	4.02
75-001	75-001_6	Thap Muoi	11	162	162			68.53																																	4.23	4.23
75-001	75-001_6	Thap Muoi	12	162	184.68			82																																	4.44	4.44
75-001	75-001_6	Thap Muoi	13	162	213.84			99.22																																	4.64	4.64
75-001	75-001_6	Thap Muoi	14	162	226.8
75-001	75-001_6	Thap Muoi	15	162	230.04
75-001	75-001_6	Thap Muoi	16	152	229.52
75-001	75-001_6	Thap Muoi	17	100	156
75-001	75-001_6	Thap Muoi	18	60	96
75-001	75-001_7	Thap Muoi	1	202	10.1	0.78																																			0.77	0.77
75-001	75-001_7	Thap Muoi	2	198	17.82	2.48																																			1.39	1.39
75-001	75-001_7	Thap Muoi	3	198	49.5	9.55																																			1.93	1.93
75-001	75-001_7	Thap Muoi	4	180	77.4																																				2.46	2.46
75-001	75-001_7	Thap Muoi	5	180	95.4																																				2.93	2.93
75-001	75-001_7	Thap Muoi	6	180	113.4			35.04																																	3.09	3.09
75-001	75-001_7	Thap Muoi	7	180	124.2			39.62																																	3.19	3.19
75-001	75-001_7	Thap Muoi	8	180	133.2			46.22																																	3.47	3.47
75-001	75-001_7	Thap Muoi	9	180	149.4			55.88																																	3.74	3.74
75-001	75-001_7	Thap Muoi	10	179	162.89																																				2.01	2.01
75-001	75-001_7	Thap Muoi	11	179	179
75-001	75-001_7	Thap Muoi	12	179	204.06
75-001	75-001_7	Thap Muoi	13	179	236.28
75-001	75-001_7	Thap Muoi	14	179	250.6
75-001	75-001_7	Thap Muoi	15	179	254.18
75-001	75-001_7	Thap Muoi	16	179	270.29
75-001	75-001_7	Thap Muoi	17	179	279.24
75-001	75-001_7	Thap Muoi	18	140	224
75-001	75-001_7	Thap Muoi	19	100	169
75-001	75-001_7	Thap Muoi	20	73	129.21
75-002	75-002_1	Thap Muoi	1	505	25.25	1.94																																			0.77	0.77
75-002	75-002_1	Thap Muoi	2	500	45	6.26																																			1.39	1.39
75-002	75-002_1	Thap Muoi	3	498	124.5	24.03																																			1.93	1.93
75-002	75-002_1	Thap Muoi	4	493	211.99	52.15																																			2.46	2.46
75-002	75-002_1	Thap Muoi	5	492	260.76																																				2.93	2.93
75-002	75-002_1	Thap Muoi	6	486	306.18			94.61																																	3.09	3.09
75-002	75-002_1	Thap Muoi	7	484	333.96			106.53																																	3.19	3.19
75-002	75-002_1	Thap Muoi	8	484	358.16			124.28																																	3.47	3.47
75-002	75-002_1	Thap Muoi	9	484	401.72			150.24																																	3.74	3.74
75-002	75-002_1	Thap Muoi	10	484	440.44																																				2.01	2.01
75-002	75-002_1	Thap Muoi	11	484	484																																				2.12	2.12
75-002	75-002_1	Thap Muoi	12	484	551.76
75-002	75-002_1	Thap Muoi	13	484	638.88
75-002	75-002_1	Thap Muoi	14	484	677.6
75-002	75-002_1	Thap Muoi	15	207	293.94
75-002	75-002_1	Thap Muoi	16	60	90.6
75-002	75-002_1	Thap Muoi	17	60	93.6
75-002	75-002_1	Thap Muoi	18	60	96
75-002	75-002_2	Thap Muoi	1	505	25.25	1.94																																			0.77	0.77
75-002	75-002_2	Thap Muoi	2	650	58.5	8.13																																			1.39	1.39
75-002	75-002_2	Thap Muoi	3	640	160	30.88																																			1.93	1.93
75-002	75-002_2	Thap Muoi	4	630	270.9																																				2.46	2.46
75-002	75-002_2	Thap Muoi	5	590	312.7			91.62																																	2.93	2.93
75-002	75-002_2	Thap Muoi	6	590	371.7			114.86																																	3.09	3.09
75-002	75-002_2	Thap Muoi	7	570	393.3			125.46																																	3.19	3.19
75-002	75-002_2	Thap Muoi	8	570	421.8			146.36																																	3.47	3.47
75-002	75-002_2	Thap Muoi	9	570	473.1			176.94																																	3.74	3.74
75-002	75-002_2	Thap Muoi	10	570	518.7																																				2.01	2.01
75-002	75-002_2	Thap Muoi	11	530	530
75-002	75-002_2	Thap Muoi	12	530	604.2
75-002	75-002_2	Thap Muoi	13	510	673.2		312.36																																		4.64	4.64
75-002	75-002_2	Thap Muoi	14	500	700		339.5																																		4.85	4.85
75-002	75-002_2	Thap Muoi	15	500	710
75-002	75-002_2	Thap Muoi	16	500	755
75-002	75-002_2	Thap Muoi	17	500	780
75-002	75-002_2	Thap Muoi	18	500	800
75-002	75-002_2	Thap Muoi	19	450	760.5
75-002	75-002_2	Thap Muoi	20	390	690.3
75-002	75-002_2	Thap Muoi	21	290	524.9
75-002	75-002_2	Thap Muoi	22	100	186
75-002	75-002_3	Thap Muoi	1	600	30	2.31																																			0.77	0.77
75-002	75-002_3	Thap Muoi	2	600	54	7.51																																			1.39	1.39
75-002	75-002_3	Thap Muoi	3	590	147.5																																				1.93	1.93
75-002	75-002_3	Thap Muoi	4	590	253.7			62.41																																	2.46	2.46
75-002	75-002_3	Thap Muoi	5	590	312.7			91.62																																	2.93	2.93
75-002	75-002_3	Thap Muoi	6	570	359.1			110.96																																	3.09	3.09
75-002	75-002_3	Thap Muoi	7	570	393.3																																				1.6	1.6
75-002	75-002_3	Thap Muoi	8	550	407
75-002	75-002_3	Thap Muoi	9	550	456.5
75-002	75-002_3	Thap Muoi	10	550	500.5
75-002	75-002_3	Thap Muoi	11	550	550
75-002	75-002_3	Thap Muoi	12	550	627
75-002	75-002_3	Thap Muoi	13	545	719.4
75-002	75-002_3	Thap Muoi	14	545	763
75-002	75-002_3	Thap Muoi	15	545	773.9
75-002	75-002_3	Thap Muoi	16	530	800.3
75-002	75-002_3	Thap Muoi	17	330	514.8
75-002	75-002_4	Thap Muoi	1	510	25.5	1.96																																			0.77	0.77
75-002	75-002_4	Thap Muoi	2	506	45.54	6.33																																			1.39	1.39
75-002	75-002_4	Thap Muoi	3	506	126.5	24.41																																			1.93	1.93
75-002	75-002_4	Thap Muoi	4	506	217.58	53.52																																			2.46	2.46
75-002	75-002_4	Thap Muoi	5	500	265																																				2.93	2.93
75-002	75-002_4	Thap Muoi	6	490	308.7			95.39																																	3.09	3.09
75-002	75-002_4	Thap Muoi	7	490	338.1			107.85																																	3.19	3.19
75-002	75-002_4	Thap Muoi	8	490	362.6			125.82																																	3.47	3.47
75-002	75-002_4	Thap Muoi	9	490	406.7			152.11																																	3.74	3.74
75-002	75-002_4	Thap Muoi	10	460	418.6			168.28																																	4.02	4.02
75-002	75-002_4	Thap Muoi	11	430	430			181.89																																	4.23	4.23
75-002	75-002_4	Thap Muoi	12	420	478.8			212.59																																	4.44	4.44
75-002	75-002_4	Thap Muoi	13	400	528			244.99																																	4.64	4.64
75-002	75-002_4	Thap Muoi	14	400	560			271.6																																	4.85	4.85
75-002	75-002_4	Thap Muoi	15	400	568			291.38																																	5.13	5.13
75-002	75-002_4	Thap Muoi	16	400	604			322.54																																	5.34	5.34
75-002	75-002_4	Thap Muoi	17	350	546			298.66																																	5.47	5.47
75-002	75-002_4	Thap Muoi	18	150	240			134.64																																	5.61	5.61
75-002	75-002_4	Thap Muoi	19	30	50.7			28.8																																	5.68	5.68
75-002	75-002_4	Thap Muoi	20	30	53.1			31.28																																	5.89	5.89
75-002	75-002_4	Thap Muoi	21	10	18.1			11.91																																	6.58	6.58
75-002	75-002_5	Thap Muoi	1	800	40	3.08																																			0.77	0.77
75-002	75-002_5	Thap Muoi	2	800	72	10.01																																			1.39	1.39
75-002	75-002_5	Thap Muoi	3	798	199.5	38.5																																			1.93	1.93
75-002	75-002_5	Thap Muoi	4	798	343.14																																				2.46	2.46
75-002	75-002_5	Thap Muoi	5	795	421.35			123.46																																	2.93	2.93
75-002	75-002_5	Thap Muoi	6	795	500.85			154.76																																	3.09	3.09
75-002	75-002_5	Thap Muoi	7	790	545.1			173.89																																	3.19	3.19
75-002	75-002_5	Thap Muoi	8	770	569.8			197.72																																	3.47	3.47
75-002	75-002_5	Thap Muoi	9	765	634.95			237.47																																	3.74	3.74
75-002	75-002_5	Thap Muoi	10	765	696.15			279.85																																	4.02	4.02
75-002	75-002_5	Thap Muoi	11	765	765			323.6																																	4.23	4.23
75-002	75-002_5	Thap Muoi	12	765	872.1			387.21																																	4.44	4.44
75-002	75-002_5	Thap Muoi	13	760	1003.2			465.48																																	4.64	4.64
75-002	75-002_5	Thap Muoi	14	700	980			475.3																																	4.85	4.85
75-002	75-002_5	Thap Muoi	15	520	738.4			378.8																																	5.13	5.13
75-002	75-002_5	Thap Muoi	16	200	302			161.27																																	5.34	5.34
75-002	75-002_5	Thap Muoi	17	150	234			128																																	5.47	5.47
75-002	75-002_5	Thap Muoi	18	100	160			89.76																																	5.61	5.61
75-002	75-002_5	Thap Muoi	19	100	169			95.99																																	5.68	5.68
75-002	75-002_5	Thap Muoi	20	50	88.5			52.13																																	5.89	5.89
75-002	75-002_5	Thap Muoi	21	50	90.5			59.55																																	6.58	6.58
75-003	75-003_1	Thap Muoi	1	406	20.3	1.56																																			0.77	0.77
75-003	75-003_1	Thap Muoi	2	381	34.29	4.77																																			1.39	1.39
75-003	75-003_1	Thap Muoi	3	374	93.5	18.05																																			1.93	1.93
75-003	75-003_1	Thap Muoi	4	369	158.67																																				2.46	2.46
75-003	75-003_1	Thap Muoi	5	368	195.04			57.15																																	2.93	2.93
75-003	75-003_1	Thap Muoi	6	366	230.58			71.25																																	3.09	3.09
75-003	75-003_1	Thap Muoi	7	213	146.97			46.88																																	3.19	3.19
75-003	75-003_1	Thap Muoi	8	200	148			51.36																																	3.47	3.47
75-003	75-003_1	Thap Muoi	9	197	163.51			61.15																																	3.74	3.74
75-003	75-003_1	Thap Muoi	10	177	161.07			64.75																																	4.02	4.02
75-003	75-003_1	Thap Muoi	11	137	137			57.95																																	4.23	4.23
75-003	75-003_1	Thap Muoi	12	87	99.18			44.04																																	4.44	4.44
75-003	75-003_1	Thap Muoi	13	37	48.84			22.66																																	4.64	4.64
75-003	75-003_1	Thap Muoi	14	17	23.8			11.54																																	4.85	4.85
75-004	75-004_1	Thap Muoi	1	715	35.75	2.75																																			0.77	0.77
75-004	75-004_1	Thap Muoi	2	713	64.17	8.92																																			1.39	1.39
75-004	75-004_1	Thap Muoi	3	713	178.25	34.4																																			1.93	1.93
75-004	75-004_1	Thap Muoi	4	712	306.16	75.32																																			2.46	2.46
75-004	75-004_1	Thap Muoi	5	702	372.06																																				2.93	2.93
75-004	75-004_1	Thap Muoi	6	702	442.26			136.66																																	3.09	3.09
75-004	75-004_1	Thap Muoi	7	702	484.38			154.52																																	3.19	3.19
75-004	75-004_1	Thap Muoi	8	665	492.1			170.76																																	3.47	3.47
75-004	75-004_1	Thap Muoi	9	656	544.48			203.64																																	3.74	3.74
75-004	75-004_1	Thap Muoi	10	652	593.32			238.51																																	4.02	4.02
75-004	75-004_1	Thap Muoi	11	650	650			274.95																																	4.23	4.23
75-004	75-004_1	Thap Muoi	12	650	741			329																																	4.44	4.44
75-004	75-004_1	Thap Muoi	13	650	858			398.11																																	4.64	4.64
75-004	75-004_1	Thap Muoi	14	500	700			339.5																																	4.85	4.85
75-004	75-004_1	Thap Muoi	15	250	355			182.12																																	5.13	5.13
75-004	75-004_1	Thap Muoi	16	135	203.85			108.86																																	5.34	5.34
75-004	75-004_1	Thap Muoi	17	105	163.8			89.6																																	5.47	5.47
75-004	75-004_1	Thap Muoi	18	97	155.2			87.07																																	5.61	5.61
75-004	75-004_2	Thap Muoi	1	1300	65	5.01																																			0.77	0.77
75-004	75-004_2	Thap Muoi	2	1282	115.38	16.04																																			1.39	1.39
75-004	75-004_2	Thap Muoi	3	1275	318.75	61.52																																			1.93	1.93
75-004	75-004_2	Thap Muoi	4	1250	537.5																																				2.46	2.46
75-004	75-004_2	Thap Muoi	5	1170	620.1			181.69																																	2.93	2.93
75-004	75-004_2	Thap Muoi	6	1125	708.75			219																																	3.09	3.09
75-004	75-004_2	Thap Muoi	7	1114	768.66			245.2																																	3.19	3.19
75-004	75-004_2	Thap Muoi	8	1100	814			282.46																																	3.47	3.47
75-004	75-004_2	Thap Muoi	9	896	743.68			278.14																																	3.74	3.74
75-004	75-004_2	Thap Muoi	10	437	397.67			159.86																																	4.02	4.02
75-004	75-004_2	Thap Muoi	11	424	424			179.35																																	4.23	4.23
75-004	75-004_2	Thap Muoi	12	398	453.72			201.45																																	4.44	4.44
75-004	75-004_2	Thap Muoi	13	380	501.6			232.74																																	4.64	4.64
75-004	75-004_2	Thap Muoi	14	360	504			244.44																																	4.85	4.85
75-004	75-004_2	Thap Muoi	15	346	491.32			252.05																																	5.13	5.13
75-004	75-004_2	Thap Muoi	16	331	499.81			266.9																																	5.34	5.34
75-004	75-004_2	Thap Muoi	17	212	330.72			180.9																																	5.47	5.47
75-004	75-004_2	Thap Muoi	18	16	25.6			14.36																																	5.61	5.61
75-004	75-004_2	Thap Muoi	19	7	11.83
75-004	75-004_2	Thap Muoi	20	7	12.39
75-004	75-004_3	Thap Muoi	1	1002	50.1	3.86																																			0.77	0.77
75-004	75-004_3	Thap Muoi	2	1002	90.18	12.54																																			1.39	1.39
75-004	75-004_3	Thap Muoi	3	996	249	48.06																																			1.93	1.93
75-004	75-004_3	Thap Muoi	4	992	426.56	104.93																																			2.46	2.46
75-004	75-004_3	Thap Muoi	5	984	521.52																																				2.93	2.93
75-004	75-004_3	Thap Muoi	6	976	614.88			190																																	3.09	3.09
75-004	75-004_3	Thap Muoi	7	968	667.92			213.07																																	3.19	3.19
75-004	75-004_3	Thap Muoi	8	962	711.88			247.02																																	3.47	3.47
75-004	75-004_3	Thap Muoi	9	955	792.65			296.45																																	3.74	3.74
75-004	75-004_3	Thap Muoi	10	947	861.77			346.43																																	4.02	4.02
75-004	75-004_3	Thap Muoi	11	939	939			397.2																																	4.23	4.23
75-004	75-004_3	Thap Muoi	12	932	1062.48			471.74																																	4.44	4.44
75-004	75-004_3	Thap Muoi	13	925	1221			566.54																																	4.64	4.64
75-004	75-004_3	Thap Muoi	14	905	1267			614.5																																	4.85	4.85
75-004	75-004_3	Thap Muoi	15	601	853.42			437.8																																	5.13	5.13
75-004	75-004_3	Thap Muoi	16	20	30.2			16.13																																	5.34	5.34
75-004	75-004_3	Thap Muoi	17	20	31.2			17.07																																	5.47	5.47
75-004	75-004_4	Thap Muoi	1	1000	50	3.85																																			0.77	0.77
75-004	75-004_4	Thap Muoi	2	1000	90	12.51																																			1.39	1.39
75-004	75-004_4	Thap Muoi	3	1000	250	48.25																																			1.93	1.93
75-004	75-004_4	Thap Muoi	4	985	423.55	104.19																																			2.46	2.46
75-004	75-004_4	Thap Muoi	5	979	518.87																																				2.93	2.93
75-004	75-004_4	Thap Muoi	6	979	616.77			190.58																																	3.09	3.09
75-004	75-004_4	Thap Muoi	7	969	668.61			213.29																																	3.19	3.19
75-004	75-004_4	Thap Muoi	8	969	717.06			248.82																																	3.47	3.47
75-004	75-004_4	Thap Muoi	9	947	786.01			293.97																																	3.74	3.74
75-004	75-004_4	Thap Muoi	10	939	854.49			343.5																																	4.02	4.02
75-004	75-004_4	Thap Muoi	11	926	926			391.7																																	4.23	4.23
75-004	75-004_4	Thap Muoi	12	926	1055.64			468.7																																	4.44	4.44
75-004	75-004_4	Thap Muoi	13	876	1156.32			536.53																																	4.64	4.64
75-004	75-004_4	Thap Muoi	14	876	1226.4			594.8																																	4.85	4.85
75-004	75-004_4	Thap Muoi	15	876	1243.92			638.13																																	5.13	5.13
75-004	75-004_4	Thap Muoi	16	352	531.52			283.83																																	5.34	5.34
75-004	75-004_5	Thap Muoi	1	1000	50	3.85																																			0.77	0.77
75-004	75-004_5	Thap Muoi	2	966	86.94	12.08																																			1.39	1.39
75-004	75-004_5	Thap Muoi	3	949	237.25	45.79																																			1.93	1.93
75-004	75-004_5	Thap Muoi	4	947	407.21	100.17																																			2.46	2.46
75-004	75-004_5	Thap Muoi	5	938	497.14																																				2.93	2.93
75-004	75-004_5	Thap Muoi	6	938	590.94			182.6																																	3.09	3.09
75-004	75-004_5	Thap Muoi	7	930	641.7			204.7																																	3.19	3.19
75-004	75-004_5	Thap Muoi	8	925	684.5			237.52																																	3.47	3.47
75-004	75-004_5	Thap Muoi	9	910	755.3			282.48																																	3.74	3.74
75-004	75-004_5	Thap Muoi	10	884	804.44			323.38																																	4.02	4.02
75-004	75-004_5	Thap Muoi	11	879	879			371.82																																	4.23	4.23
75-004	75-004_5	Thap Muoi	12	879	1002.06			444.91																																	4.44	4.44
75-004	75-004_5	Thap Muoi	13	879	1160.28			538.37																																	4.64	4.64
75-004	75-004_5	Thap Muoi	14	879	1230.6			596.84																																	4.85	4.85
75-004	75-004_5	Thap Muoi	15	589	836.38			429.06																																	5.13	5.13
75-004	75-004_5	Thap Muoi	16	200	302			161.27																																	5.34	5.34
75-004	75-004_6	Thap Muoi	1	1149	57.45	4.42																																			0.77	0.77
75-004	75-004_6	Thap Muoi	2	1140	102.6	14.26																																			1.39	1.39
75-004	75-004_6	Thap Muoi	3	1130	282.5	54.52																																			1.93	1.93
75-004	75-004_6	Thap Muoi	4	1122	482.46	118.69																																			2.46	2.46
75-004	75-004_6	Thap Muoi	5	1102	584.06																																				2.93	2.93
75-004	75-004_6	Thap Muoi	6	1100	693			214.14																																	3.09	3.09
75-004	75-004_6	Thap Muoi	7	1100	759			242.12																																	3.19	3.19
75-004	75-004_6	Thap Muoi	8	1100	814			282.46																																	3.47	3.47
75-004	75-004_6	Thap Muoi	9	1100	913			341.46																																	3.74	3.74
75-004	75-004_6	Thap Muoi	10	1062	966.42			388.5																																	4.02	4.02
75-004	75-004_6	Thap Muoi	11	992	992			419.62																																	4.23	4.23
75-004	75-004_6	Thap Muoi	12	990	1128.6			501.1																																	4.44	4.44
75-004	75-004_6	Thap Muoi	13	990	1306.8			606.36																																	4.64	4.64
75-004	75-004_6	Thap Muoi	14	990	1386			672.21																																	4.85	4.85
75-004	75-004_6	Thap Muoi	15	990	1405.8			721.18																																	5.13	5.13
75-004	75-004_6	Thap Muoi	16	760	1147.6			612.82																																	5.34	5.34
75-004	75-004_6	Thap Muoi	17	600	936			511.99																																	5.47	5.47
75-004	75-004_6	Thap Muoi	18	350	560			314.16																																	5.61	5.61
75-004	75-004_6	Thap Muoi	19	150	253.5			143.99																																	5.68	5.68
75-004	75-004_7	Thap Muoi	1	1000	50	3.85																																			0.77	0.77
75-004	75-004_7	Thap Muoi	2	973	87.57	12.17																																			1.39	1.39
75-004	75-004_7	Thap Muoi	3	965	241.25	46.56																																			1.93	1.93
75-004	75-004_7	Thap Muoi	4	940	404.2	99.43																																			2.46	2.46
75-004	75-004_7	Thap Muoi	5	933	494.49																																				2.93	2.93
75-004	75-004_7	Thap Muoi	6	920	579.6			179.1																																	3.09	3.09
75-004	75-004_7	Thap Muoi	7	920	634.8			202.5																																	3.19	3.19
75-004	75-004_7	Thap Muoi	8	920	680.8			236.24																																	3.47	3.47
75-004	75-004_7	Thap Muoi	9	920	763.6			285.59																																	3.74	3.74
75-004	75-004_7	Thap Muoi	10	920	837.2			336.55																																	4.02	4.02
75-004	75-004_7	Thap Muoi	11	913	913			386.2																																	4.23	4.23
75-004	75-004_7	Thap Muoi	12	908	1035.12			459.59																																	4.44	4.44
75-004	75-004_7	Thap Muoi	13	900	1188			551.23																																	4.64	4.64
75-004	75-004_7	Thap Muoi	14	900	1260			611.1																																	4.85	4.85
75-004	75-004_7	Thap Muoi	15	900	1278			655.61																																	5.13	5.13
75-004	75-004_7	Thap Muoi	16	595	898.45			479.77																																	5.34	5.34
75-004	75-004_7	Thap Muoi	17	135	210.6			115.2																																	5.47	5.47
75-005	75-005_1	Thap Muoi	1	110	5.5	0.42																																			0.77	0.77
75-005	75-005_1	Thap Muoi	2	117	10.53	1.46																																			1.39	1.39
75-005	75-005_1	Thap Muoi	3	93	23.25	4.49																																			1.93	1.93
75-005	75-005_1	Thap Muoi	4	91	39.13	9.63																																			2.46	2.46
75-005	75-005_1	Thap Muoi	5	91	48.23	14.13																																			2.93	2.93
75-005	75-005_1	Thap Muoi	6	91	57.33
75-005	75-005_1	Thap Muoi	7	82	56.58
75-005	75-005_1	Thap Muoi	8	73	54.02
75-005	75-005_1	Thap Muoi	9	73	60.59
75-005	75-005_1	Thap Muoi	10	71	64.61
75-005	75-005_1	Thap Muoi	11	71	71
75-005	75-005_1	Thap Muoi	12	70	79.8
75-005	75-005_1	Thap Muoi	13	70	92.4
75-005	75-005_1	Thap Muoi	14	40	56
75-005	75-005_1	Thap Muoi	15	39	55.38
75-005	75-005_1	Thap Muoi	16	25	37.75
75-005	75-005_1	Thap Muoi	17	23	35.88
75-005	75-005_1	Thap Muoi	18	8	12.8
75-005	75-005_1	Thap Muoi	19	7	11.83
75-005	75-005_2	Thap Muoi	1	200	10	0.77																																			0.77	0.77
75-005	75-005_2	Thap Muoi	2	188	16.92	2.35																																			1.39	1.39
75-005	75-005_2	Thap Muoi	3	180	45	8.69																																			1.93	1.93
75-005	75-005_2	Thap Muoi	4	177	76.11			18.72																																	2.46	2.46
75-005	75-005_2	Thap Muoi	5	165	87.45			25.62																																	2.93	2.93
75-005	75-005_2	Thap Muoi	6	165	103.95			32.12																																	3.09	3.09
75-005	75-005_2	Thap Muoi	7	165	113.85
75-005	75-005_2	Thap Muoi	8	165	122.1
75-005	75-005_2	Thap Muoi	9	164	136.12			50.91																																	3.74	3.74
75-005	75-005_2	Thap Muoi	10	164	149.24
75-005	75-005_2	Thap Muoi	11	161	161
75-005	75-005_2	Thap Muoi	12	160	182.4
75-005	75-005_2	Thap Muoi	13	160	211.2
75-005	75-005_2	Thap Muoi	14	160	224
75-005	75-005_2	Thap Muoi	15	160	227.2
75-005	75-005_2	Thap Muoi	16	158	238.58
75-005	75-005_2	Thap Muoi	17	73	113.88
75-005	75-005_2	Thap Muoi	18	71	113.6
75-005	75-005_2	Thap Muoi	19	64	108.16
75-005	75-005_2	Thap Muoi	20	62	109.74
75-005	75-005_2	Thap Muoi	21	52	94.12
75-005	75-005_2	Thap Muoi	22	46	85.56
75-005	75-005_2	Thap Muoi	23	44	84.92
75-005	75-005_2	Thap Muoi	24	19	38
75-005	75-005_2	Thap Muoi	25	16	33.6
75-006	75-006_1	Thap Muoi	1	102	5.1				0.39																																								3.85
75-006	75-006_1	Thap Muoi	2	105	9.45				1.31																																								6.95
75-006	75-006_1	Thap Muoi	3	105	26.25					5.07																																							9.65
75-006	75-006_1	Thap Muoi	4	105	45.15					11.11																																							12.3
75-006	75-006_1	Thap Muoi	5	105	55.65					16.31																																							14.65
75-006	75-006_1	Thap Muoi	6	105	66.15					20.44																																							15.45
75-006	75-006_1	Thap Muoi	7	105	72.45					23.11																																							15.95
75-006	75-006_1	Thap Muoi	8	104	76.96					26.71																																							17.35
75-006	75-006_1	Thap Muoi	9	104	86.32
75-006	75-006_1	Thap Muoi	10	104	94.64
75-006	75-006_1	Thap Muoi	11	102	102
75-006	75-006_1	Thap Muoi	12	102	116.28
75-006	75-006_1	Thap Muoi	13	98	129.36
75-006	75-006_1	Thap Muoi	14	74	103.6
75-006	75-006_1	Thap Muoi	15	60	85.2
75-006	75-006_1	Thap Muoi	16	40	60.4
75-006	75-006_1	Thap Muoi	17	25	39
75-006	75-006_1	Thap Muoi	18	10	16
75-006	75-006_2	Thap Muoi	1	105	5.25				0.4																																								3.85
75-006	75-006_2	Thap Muoi	2	105	9.45				1.31																																								6.95
75-006	75-006_2	Thap Muoi	3	105	26.25				5.07																																								9.65
75-006	75-006_2	Thap Muoi	4	95	40.85																																												12.3
75-006	75-006_2	Thap Muoi	5	95	50.35					14.75																																							14.65
75-006	75-006_2	Thap Muoi	6	90	56.7					17.52																																							15.45
75-006	75-006_2	Thap Muoi	7	76	52.44					16.73																																							15.95
75-006	75-006_2	Thap Muoi	8	64	47.36					16.43																																							17.35
75-006	75-006_2	Thap Muoi	9	30	24.9
75-006	75-006_2	Thap Muoi	10	30	27.3
75-006	75-006_2	Thap Muoi	11	30	30
75-006	75-006_2	Thap Muoi	12	24	27.36
75-006	75-006_2	Thap Muoi	13	24	31.68
75-006	75-006_2	Thap Muoi	14	24	33.6
75-006	75-006_2	Thap Muoi	15	20	28.4
75-006	75-006_2	Thap Muoi	16	17	25.67
75-006	75-006_2	Thap Muoi	17	12	18.72
75-006	75-006_2	Thap Muoi	18	8	12.8
75-006	75-006_2	Thap Muoi	19	8	13.52
75-006	75-006_2	Thap Muoi	20	8	14.16
75-006	75-006_2	Thap Muoi	21	8	14.48
75-006	75-006_2	Thap Muoi	22	8	14.88
75-008	75-008_1	Thap Muoi	1	600	30	2.31																																			0.77	0.77
75-008	75-008_1	Thap Muoi	2	590	53.1	7.38																																			1.39	1.39
75-008	75-008_1	Thap Muoi	3	590	147.5			28.47																																	1.93	1.93
75-008	75-008_1	Thap Muoi	4	580	249.4			61.35																																	2.46	2.46
75-008	75-008_1	Thap Muoi	5	580	307.4			90.07																																	2.93	2.93
75-008	75-008_1	Thap Muoi	6	540	340.2			105.12																																	3.09	3.09
75-008	75-008_1	Thap Muoi	7	540	372.6			118.86																																	3.19	3.19
75-008	75-008_1	Thap Muoi	8	540	399.6			138.66																																	3.47	3.47
75-008	75-008_1	Thap Muoi	9	520	431.6			161.42																																	3.74	3.74
75-008	75-008_1	Thap Muoi	10	520	473.2			190.23																																	4.02	4.02
75-008	75-008_1	Thap Muoi	11	520	520			219.96																																	4.23	4.23
75-008	75-008_1	Thap Muoi	12	520	592.8			263.2																																	4.44	4.44
75-008	75-008_1	Thap Muoi	13	480	633.6			293.99																																	4.64	4.64
75-008	75-008_1	Thap Muoi	14	180	252			122.22																																	4.85	4.85
75-008	75-008_1	Thap Muoi	15	180	255.6			131.12																																	5.13	5.13
75-008	75-008_1	Thap Muoi	16	180	271.8			145.14																																	5.34	5.34
75-008	75-008_1	Thap Muoi	17	80	124.8			68.27																																	5.47	5.47
75-008	75-008_1	Thap Muoi	18	40	64
75-008	75-008_2	Thap Muoi	1	600	30	2.31																																			0.77	0.77
75-008	75-008_2	Thap Muoi	2	585	52.65																																				1.39	1.39
75-008	75-008_2	Thap Muoi	3	580	145			27.99																																	1.93	1.93
75-008	75-008_2	Thap Muoi	4	580	249.4
75-008	75-008_2	Thap Muoi	5	565	299.45
75-008	75-008_2	Thap Muoi	6	525	330.75
75-008	75-008_2	Thap Muoi	7	240	165.6
75-008	75-008_2	Thap Muoi	8	240	177.6
75-008	75-008_2	Thap Muoi	9	240	199.2
75-008	75-008_2	Thap Muoi	10	240	218.4
75-008	75-008_2	Thap Muoi	11	230	230
75-008	75-008_2	Thap Muoi	12	225	256.5
75-008	75-008_2	Thap Muoi	13	225	297
75-008	75-008_2	Thap Muoi	14	225	315
75-008	75-008_2	Thap Muoi	15	215	305.3
75-008	75-008_2	Thap Muoi	16	215	324.65
75-008	75-008_2	Thap Muoi	17	15	23.4
75-008	75-008_2	Thap Muoi	18	15	24
75-009	75-009_1	Thap Muoi	1	153	7.65	0.59																																			0.77	0.77
75-009	75-009_1	Thap Muoi	2	153	13.77	1.91																																			1.39	1.39
75-009	75-009_1	Thap Muoi	3	153	38.25	7.38																																			1.93	1.93
75-009	75-009_1	Thap Muoi	4	153	65.79			16.18																																	2.46	2.46
75-009	75-009_1	Thap Muoi	5	152	80.56			23.6																																	2.93	2.93
75-009	75-009_1	Thap Muoi	6	146	91.98			28.42																																	3.09	3.09
75-009	75-009_1	Thap Muoi	7	146	100.74			32.14																																	3.19	3.19
75-009	75-009_1	Thap Muoi	8	140	103.6			35.95																																	3.47	3.47
75-009	75-009_1	Thap Muoi	9	140	116.2			43.46																																	3.74	3.74
75-009	75-009_1	Thap Muoi	10	140	127.4			51.21																																	4.02	4.02
75-009	75-009_1	Thap Muoi	11	140	140			59.22																																	4.23	4.23
75-009	75-009_1	Thap Muoi	12	140	159.6			70.86																																	4.44	4.44
75-009	75-009_1	Thap Muoi	13	140	184.8			85.75																																	4.64	4.64
75-009	75-009_1	Thap Muoi	14	120	168
75-009	75-009_1	Thap Muoi	15	100	142
75-009	75-009_1	Thap Muoi	16	90	135.9
75-009	75-009_1	Thap Muoi	17	75	117
75-009	75-009_1	Thap Muoi	18	55	88
75-009	75-009_1	Thap Muoi	19	37	62.53
75-009	75-009_1	Thap Muoi	20	20	35.4
75-009	75-009_1	Thap Muoi	21	5	9.05
75-010	75-010_1	Thap Muoi	1	410	20.5	1.58																																			0.77	0.77
75-010	75-010_1	Thap Muoi	2	410	36.9	5.13																																			1.39	1.39
75-010	75-010_1	Thap Muoi	3	310	77.5	14.96																																			1.93	1.93
75-010	75-010_1	Thap Muoi	4	310	133.3	32.79																																			2.46	2.46
75-010	75-010_1	Thap Muoi	5	310	164.3			48.14																																	2.93	2.93
75-010	75-010_1	Thap Muoi	6	264	166.32			51.39																																	3.09	3.09
75-010	75-010_1	Thap Muoi	7	264	182.16			58.11																																	3.19	3.19
75-010	75-010_1	Thap Muoi	8	264	195.36			67.79																																	3.47	3.47
75-010	75-010_1	Thap Muoi	9	264	219.12																																				1.87	1.87
75-010	75-010_1	Thap Muoi	10	260	236.6
75-010	75-010_1	Thap Muoi	11	240	240
75-010	75-010_1	Thap Muoi	12	220	250.8
75-010	75-010_1	Thap Muoi	13	220	290.4
75-010	75-010_1	Thap Muoi	14	220	308
75-010	75-010_1	Thap Muoi	15	220	312.4
75-010	75-010_1	Thap Muoi	16	220	332.2
75-010	75-010_1	Thap Muoi	17	160	249.6
75-010	75-010_1	Thap Muoi	18	100	160
75-010	75-010_1	Thap Muoi	19	50	84.5
75-011	75-011_1	Thap Muoi	1	102	5.1	0.39																																			0.77	0.77
75-011	75-011_1	Thap Muoi	2	102	9.18	1.28																																			1.39	1.39
75-011	75-011_1	Thap Muoi	3	102	25.5	4.92																																			1.93	1.93
75-011	75-011_1	Thap Muoi	4	100	43			10.58																																	2.46	2.46
75-011	75-011_1	Thap Muoi	5	100	53			15.53																																	2.93	2.93
75-011	75-011_1	Thap Muoi	6	94	59.22			18.3																																	3.09	3.09
75-011	75-011_1	Thap Muoi	7	94	64.86			20.69																																	3.19	3.19
75-011	75-011_1	Thap Muoi	8	94	69.56			24.14																																	3.47	3.47
75-011	75-011_1	Thap Muoi	9	94	78.02			29.18																																	3.74	3.74
75-011	75-011_1	Thap Muoi	10	94	85.54			34.39																																	4.02	4.02
75-011	75-011_1	Thap Muoi	11	94	94			39.76																																	4.23	4.23
75-011	75-011_1	Thap Muoi	12	94	107.16			47.58																																	4.44	4.44
75-011	75-011_1	Thap Muoi	13	94	124.08			57.57																																	4.64	4.64
75-011	75-011_1	Thap Muoi	14	94	131.6			63.83																																	4.85	4.85
75-011	75-011_1	Thap Muoi	15	80	113.6			58.28																																	5.13	5.13
75-011	75-011_1	Thap Muoi	16	50	75.5			40.32																																	5.34	5.34
75-011	75-011_2	Thap Muoi	1	300	15	1.16																																			0.77	0.77
75-011	75-011_2	Thap Muoi	2	300	27	3.75																																			1.39	1.39
75-011	75-011_2	Thap Muoi	3	300	75	14.48																																			1.93	1.93
75-011	75-011_2	Thap Muoi	4	296	127.28	31.31																																			2.46	2.46
75-011	75-011_2	Thap Muoi	5	296	156.88																																				2.93	2.93
75-011	75-011_2	Thap Muoi	6	296	186.48																																				3.09	3.09
75-011	75-011_2	Thap Muoi	7	296	204.24			65.15																																	3.19	3.19
75-011	75-011_2	Thap Muoi	8	296	219.04			76.01																																	3.47	3.47
75-011	75-011_2	Thap Muoi	9	296	245.68			91.88																																	3.74	3.74
75-011	75-011_2	Thap Muoi	10	296	269.36																																				2.01	2.01
75-011	75-011_2	Thap Muoi	11	296	296																																				2.12	2.12
75-011	75-011_2	Thap Muoi	12	296	337.44																																				2.22	2.22
75-011	75-011_2	Thap Muoi	13	296	390.72																																				2.32	2.32
75-011	75-011_2	Thap Muoi	14	296	414.4																																				2.43	2.43
75-011	75-011_2	Thap Muoi	15	296	420.32
75-011	75-011_2	Thap Muoi	16	296	446.96
75-011	75-011_2	Thap Muoi	17	296	461.76
75-011	75-011_2	Thap Muoi	18	296	473.6
75-011	75-011_2	Thap Muoi	19	196	331.24
75-012	75-012_1	Thap Muoi	1	204	10.2						0.79																																						3.85
75-012	75-012_1	Thap Muoi	2	200	18						2.5																																						6.95
75-012	75-012_1	Thap Muoi	3	200	50						9.65																																						9.65
75-012	75-012_1	Thap Muoi	4	200	86						21.16																																						12.3
75-012	75-012_1	Thap Muoi	5	200	106						31.06																																						14.65
75-012	75-012_1	Thap Muoi	6	200	126						38.93																																						15.45
75-012	75-012_1	Thap Muoi	7	200	138						44.02																																						15.95
75-012	75-012_1	Thap Muoi	8	200	148						51.36																																						17.35
75-012	75-012_1	Thap Muoi	9	200	166						62.08																																						18.7
75-012	75-012_1	Thap Muoi	10	200	182						73.16																																						20.1
75-012	75-012_1	Thap Muoi	11	152	152						64.3																																						21.15
75-012	75-012_2	Thap Muoi	1	500	25																		1.93																										3.85
75-012	75-012_2	Thap Muoi	2	500	45																		6.26																										6.95
75-012	75-012_2	Thap Muoi	3	500	125																		24.13																										9.65
75-012	75-012_2	Thap Muoi	4	500	215						52.89																																						12.3
75-012	75-012_2	Thap Muoi	5	500	265						77.65																																						14.65
75-012	75-012_2	Thap Muoi	6	500	315						97.34																																						15.45
75-012	75-012_2	Thap Muoi	7	500	345						110.06																																						15.95
75-012	75-012_2	Thap Muoi	8	470	347.8						120.69																																						17.35
75-012	75-012_2	Thap Muoi	9	440	365.2						136.58																																						18.7
75-012	75-012_2	Thap Muoi	10	440	400.4						160.96																																						20.1
75-012	75-012_2	Thap Muoi	11	440	440						186.12																																						21.15
75-012	75-012_2	Thap Muoi	12	430	490.2						217.65																																						22.2
75-012	75-012_2	Thap Muoi	13	430	567.6						263.37																																						23.2
75-012	75-012_2	Thap Muoi	14	400	560						271.6																																						24.25
75-012	75-012_2	Thap Muoi	15	370	525.4						269.53																																						25.65
75-012	75-012_2	Thap Muoi	16	250	377.5						201.59																																						26.7
75-012	75-012_2	Thap Muoi	17	180	280.8						153.6																																						27.35
75-012	75-012_2	Thap Muoi	18	60	96						53.86																																						28.05
75-012	75-012_2	Thap Muoi	19	60	101.4						57.6																																						28.4
75-012	75-012_3	Thap Muoi	1	200	10																		0.77																										3.85
75-012	75-012_3	Thap Muoi	2	200	18																		2.5																										6.95
75-012	75-012_3	Thap Muoi	3	200	50						9.65																																						9.65
75-012	75-012_3	Thap Muoi	4	200	86						21.16																																						12.3
75-012	75-012_3	Thap Muoi	5	200	106						31.06																																						14.65
75-012	75-012_3	Thap Muoi	6	200	126						38.93																																						15.45
75-012	75-012_3	Thap Muoi	7	195	134.55						42.92																																						15.95
75-012	75-012_3	Thap Muoi	8	195	144.3						50.07																																						17.35
75-012	75-012_3	Thap Muoi	9	195	161.85						60.53																																						18.7
75-012	75-012_3	Thap Muoi	10	180	163.8						65.85																																						20.1
75-012	75-012_3	Thap Muoi	11	180	180						76.14																																						21.15
75-012	75-012_3	Thap Muoi	12	180	205.2						91.11																																						22.2
75-012	75-012_3	Thap Muoi	13	173	228.36						105.96																																						23.2
75-012	75-012_3	Thap Muoi	14	153	214.2						103.89																																						24.25
75-012	75-012_3	Thap Muoi	15	121	171.82
75-012	75-012_4	Thap Muoi	1	400	20	1.54																																			0.77	0.77
75-012	75-012_4	Thap Muoi	2	400	36	5																																			1.39	1.39
75-012	75-012_4	Thap Muoi	3	400	100			19.3																																	1.93	1.93
75-012	75-012_4	Thap Muoi	4	400	172			42.31																																	2.46	2.46
75-012	75-012_4	Thap Muoi	5	395	209.35			61.34																																	2.93	2.93
75-012	75-012_4	Thap Muoi	6	350	220.5			68.13																																	3.09	3.09
75-012	75-012_4	Thap Muoi	7	350	241.5			77.04																																	3.19	3.19
75-012	75-012_4	Thap Muoi	8	350	259			89.87																																	3.47	3.47
75-012	75-012_4	Thap Muoi	9	350	290.5			108.65																																	3.74	3.74
75-012	75-012_4	Thap Muoi	10	330	300.3			120.72																																	4.02	4.02
75-012	75-012_4	Thap Muoi	11	330	330			139.59																																	4.23	4.23
75-012	75-012_4	Thap Muoi	12	330	376.2			167.03																																	4.44	4.44
75-012	75-012_4	Thap Muoi	13	330	435.6			202.12																																	4.64	4.64
75-012	75-012_4	Thap Muoi	14	305	427
75-012	75-012_5	Thap Muoi	1	400	20	1.54																																			0.77	0.77
75-012	75-012_5	Thap Muoi	2	370	33.3	4.63																																			1.39	1.39
75-012	75-012_5	Thap Muoi	3	370	92.5	17.85																																			1.93	1.93
75-012	75-012_5	Thap Muoi	4	360	154.8			38.08																																	2.46	2.46
75-012	75-012_5	Thap Muoi	5	360	190.8			55.9																																	2.93	2.93
75-012	75-012_5	Thap Muoi	6	360	226.8			70.08																																	3.09	3.09
75-012	75-012_5	Thap Muoi	7	360	248.4			79.24																																	3.19	3.19
75-012	75-012_5	Thap Muoi	8	360	266.4			92.44																																	3.47	3.47
75-012	75-012_5	Thap Muoi	9	360	298.8			111.75																																	3.74	3.74
75-012	75-012_5	Thap Muoi	10	360	327.6			131.7																																	4.02	4.02
75-012	75-012_5	Thap Muoi	11	355	355			150.17																																	4.23	4.23
75-012	75-012_5	Thap Muoi	12	355	404.7			179.69																																	4.44	4.44
75-012	75-012_5	Thap Muoi	13	339	447.48			207.63																																	4.64	4.64
75-012	75-012_5	Thap Muoi	14	331	463.4			224.75																																	4.85	4.85
75-012	75-012_5	Thap Muoi	15	331	470.02			241.12																																	5.13	5.13
75-012	75-012_5	Thap Muoi	16	317	478.67			255.61																																	5.34	5.34
75-012	75-012_6	Thap Muoi	1	600	30	2.31																																			0.77	0.77
75-012	75-012_6	Thap Muoi	2	600	54	7.51																																			1.39	1.39
75-012	75-012_6	Thap Muoi	3	595	148.75			28.71																																	1.93	1.93
75-012	75-012_6	Thap Muoi	4	595	255.85			62.94																																	2.46	2.46
75-012	75-012_6	Thap Muoi	5	590	312.7			91.62																																	2.93	2.93
75-012	75-012_6	Thap Muoi	6	540	340.2			105.12																																	3.09	3.09
75-012	75-012_6	Thap Muoi	7	540	372.6			118.86																																	3.19	3.19
75-012	75-012_6	Thap Muoi	8	540	399.6			138.66																																	3.47	3.47
75-012	75-012_6	Thap Muoi	9	540	448.2			167.63																																	3.74	3.74
75-012	75-012_6	Thap Muoi	10	540	491.4			197.54																																	4.02	4.02
75-012	75-012_6	Thap Muoi	11	540	540			228.42																																	4.23	4.23
75-012	75-012_6	Thap Muoi	12	535	609.9			270.8																																	4.44	4.44
75-012	75-012_6	Thap Muoi	13	530	699.6			324.61																																	4.64	4.64
75-012	75-012_6	Thap Muoi	14	530	742			359.87																																	4.85	4.85
75-012	75-012_6	Thap Muoi	15	520	738.4			378.8																																	5.13	5.13
75-012	75-012_6	Thap Muoi	16	490	739.9			395.11																																	5.34	5.34
75-012	75-012_6	Thap Muoi	17	456	711.36			389.11																																	5.47	5.47
75-012	75-012_6	Thap Muoi	18	456	729.6			409.31																																	5.61	5.61
75-012	75-012_7	Thap Muoi	1	600	30	2.31																																			0.77	0.77
75-012	75-012_7	Thap Muoi	2	600	54	7.51																																			1.39	1.39
75-012	75-012_7	Thap Muoi	3	590	147.5																																				1.93	1.93
75-012	75-012_7	Thap Muoi	4	570	245.1			60.29																																	2.46	2.46
75-012	75-012_7	Thap Muoi	5	520	275.6			80.75																																	2.93	2.93
75-012	75-012_7	Thap Muoi	6	520	327.6			101.23																																	3.09	3.09
75-012	75-012_7	Thap Muoi	7	520	358.8			114.46																																	3.19	3.19
75-012	75-012_7	Thap Muoi	8	518	383.32			133.01																																	3.47	3.47
75-012	75-012_7	Thap Muoi	9	500	415			155.21																																	3.74	3.74
75-012	75-012_7	Thap Muoi	10	500	455			182.91																																	4.02	4.02
75-012	75-012_7	Thap Muoi	11	490	490			207.27																																	4.23	4.23
75-012	75-012_7	Thap Muoi	12	460	524.4			232.83																																	4.44	4.44
75-012	75-012_7	Thap Muoi	13	400	528			244.99																																	4.64	4.64
75-012	75-012_7	Thap Muoi	14	395	553			268.21																																	4.85	4.85
75-012	75-012_7	Thap Muoi	15	395	560.9			287.74																																	5.13	5.13
75-012	75-012_7	Thap Muoi	16	375	566.25			302.38																																	5.34	5.34
75-012	75-012_7	Thap Muoi	17	312	486.72			266.24																																	5.47	5.47
75-012	75-012_7	Thap Muoi	18	250	400			224.4																																	5.61	5.61
75-012	75-012_7	Thap Muoi	19	200	338			191.98																																	5.68	5.68
75-012	75-012_7	Thap Muoi	20	170	300.9			177.23																																	5.89	5.89
75-012	75-012_8	Thap Muoi	1	714	35.7	2.75																																			0.77	0.77
75-012	75-012_8	Thap Muoi	2	710	63.9	8.88																																			1.39	1.39
75-012	75-012_8	Thap Muoi	3	705	176.25	34.02																																			1.93	1.93
75-012	75-012_8	Thap Muoi	4	635	273.05						67.17																																						12.3
75-012	75-012_8	Thap Muoi	5	600	318						93.17																																						14.65
75-012	75-012_8	Thap Muoi	6	450	283.5						87.6																																						15.45
75-012	75-012_8	Thap Muoi	7	250	172.5						55.03																																						15.95
75-012	75-012_8	Thap Muoi	8	90	66.6						23.11																																						17.35
75-012	75-012_8	Thap Muoi	9	50	41.5						15.52																																						18.7
75-012	75-012_8	Thap Muoi	10	15	13.65						5.49																																						20.1
75-012	75-012_8	Thap Muoi	11	5	5						2.12																																						21.15
75-012	75-012_8	Thap Muoi	12	3	3.42
75-012	75-012_8	Thap Muoi	13	3	3.96
75-012	75-012_8	Thap Muoi	14	3	4.2
75-012	75-012_8	Thap Muoi	15	3	4.26
75-013	75-013_1	Thap Muoi	1	150	7.5	0.58																																			0.77	0.77
75-013	75-013_1	Thap Muoi	2	148	13.32	1.85																																			1.39	1.39
75-013	75-013_1	Thap Muoi	3	148	37		7.14																																		1.93	1.93
75-013	75-013_1	Thap Muoi	4	148	63.64		15.66																																		2.46	2.46
75-013	75-013_1	Thap Muoi	5	148	78.44		22.98																																		2.93	2.93
75-013	75-013_1	Thap Muoi	6	148	93.24		28.81																																		3.09	3.09
75-013	75-013_1	Thap Muoi	7	148	102.12		32.58																																		3.19	3.19
75-013	75-013_1	Thap Muoi	8	148	109.52
75-013	75-013_1	Thap Muoi	9	148	122.84
75-013	75-013_1	Thap Muoi	10	148	134.68
75-013	75-013_1	Thap Muoi	11	148	148
75-013	75-013_1	Thap Muoi	12	142	161.88
75-013	75-013_1	Thap Muoi	13	142	187.44
75-013	75-013_1	Thap Muoi	14	142	198.8
75-013	75-013_1	Thap Muoi	15	118	167.56
75-013	75-013_1	Thap Muoi	16	74	111.74
75-013	75-013_1	Thap Muoi	17	32	49.92
75-013	75-013_2	Thap Muoi	1	200	10	0.77																																			0.77	0.77
75-013	75-013_2	Thap Muoi	2	200	18	2.5																																			1.39	1.39
75-013	75-013_2	Thap Muoi	3	200	50	9.65																																			1.93	1.93
75-013	75-013_2	Thap Muoi	4	200	86	21.16																																			2.46	2.46
75-013	75-013_2	Thap Muoi	5	200	106	31.06																																			2.93	2.93
75-013	75-013_2	Thap Muoi	6	200	126	38.93																																			3.09	3.09
75-013	75-013_2	Thap Muoi	7	200	138			44.02																																	3.19	3.19
75-013	75-013_2	Thap Muoi	8	200	148			51.36																																	3.47	3.47
75-013	75-013_2	Thap Muoi	9	199	165.17																																				1.87	1.87
75-013	75-013_2	Thap Muoi	10	199	181.09																																				2.01	2.01
75-013	75-013_2	Thap Muoi	11	199	199																																				2.12	2.12
75-013	75-013_2	Thap Muoi	12	199	226.86																																				2.22	2.22
75-013	75-013_2	Thap Muoi	13	183	241.56																																				2.32	2.32
75-013	75-013_2	Thap Muoi	14	135	189																																				2.43	2.43
75-013	75-013_2	Thap Muoi	15	85	120.7																																				2.57	2.57
75-013	75-013_2	Thap Muoi	16	73	110.23
75-013	75-013_2	Thap Muoi	17	49	76.44
75-013	75-013_3	Thap Muoi	1	150	7.5	0.58																																			0.77	0.77
75-013	75-013_3	Thap Muoi	2	150	13.5	1.88																																			1.39	1.39
75-013	75-013_3	Thap Muoi	3	150	37.5			7.24																																	1.93	1.93
75-013	75-013_3	Thap Muoi	4	150	64.5			15.87																																	2.46	2.46
75-013	75-013_3	Thap Muoi	5	150	79.5			23.29																																	2.93	2.93
75-013	75-013_3	Thap Muoi	6	150	94.5			29.2																																	3.09	3.09
75-013	75-013_3	Thap Muoi	7	150	103.5			33.02																																	3.19	3.19
75-013	75-013_3	Thap Muoi	8	145	107.3																																				1.74	1.74
75-013	75-013_3	Thap Muoi	9	140	116.2																																				1.87	1.87
75-013	75-013_3	Thap Muoi	10	140	127.4																																				2.01	2.01
75-013	75-013_3	Thap Muoi	11	140	140																																				2.12	2.12
75-013	75-013_3	Thap Muoi	12	120	136.8																																				2.22	2.22
75-013	75-013_3	Thap Muoi	13	83	109.56																																				2.32	2.32
75-013	75-013_3	Thap Muoi	14	33	46.2																																				2.43	2.43
75-013	75-013_3	Thap Muoi	15	33	46.86																																				2.57	2.57
75-013	75-013_3	Thap Muoi	16	33	49.83																																				2.67	2.67
75-013	75-013_3	Thap Muoi	17	33	51.48																																				2.74	2.74
75-013	75-013_3	Thap Muoi	18	33	52.8																																				2.81	2.81
75-013	75-013_3	Thap Muoi	19	33	55.77																																				2.84	2.84
75-013	75-013_3	Thap Muoi	20	33	58.41																																				2.95	2.95
75-014	75-014_1	Thap Muoi	1	300	15	1.16																																			0.77	0.77
75-014	75-014_1	Thap Muoi	2	285	25.65	3.57																																			1.39	1.39
75-014	75-014_1	Thap Muoi	3	235	58.75	11.34																																			1.93	1.93
75-014	75-014_1	Thap Muoi	4	233	100.19	24.65																																			2.46	2.46
75-014	75-014_1	Thap Muoi	5	231	122.43	35.87																																			2.93	2.93
75-014	75-014_1	Thap Muoi	6	231	145.53			44.97																																	3.09	3.09
75-014	75-014_1	Thap Muoi	7	229	158.01			50.41																																	3.19	3.19
75-014	75-014_1	Thap Muoi	8	229	169.46			58.8																																	3.47	3.47
75-014	75-014_1	Thap Muoi	9	229	190.07			71.09																																	3.74	3.74
75-014	75-014_1	Thap Muoi	10	229	208.39			83.77																																	4.02	4.02
75-014	75-014_1	Thap Muoi	11	229	229			96.87																																	4.23	4.23
75-014	75-014_1	Thap Muoi	12	229	261.06			115.91																																	4.44	4.44
75-014	75-014_1	Thap Muoi	13	229	302.28			140.26																																	4.64	4.64
75-014	75-014_1	Thap Muoi	14	227	317.8			154.13																																	4.85	4.85
75-014	75-014_1	Thap Muoi	15	224	318.08			163.18																																	5.13	5.13
75-014	75-014_1	Thap Muoi	16	221	333.71			178.2																																	5.34	5.34
75-014	75-014_1	Thap Muoi	17	190	296.4			162.13																																	5.47	5.47
75-014	75-014_2	Thap Muoi	1	306	15.3	1.18																																			0.77	0.77
75-014	75-014_2	Thap Muoi	2	302	27.18	3.78																																			1.39	1.39
75-014	75-014_2	Thap Muoi	3	301	75.25	14.52																																			1.93	1.93
75-014	75-014_2	Thap Muoi	4	300	129	31.73																																			2.46	2.46
75-014	75-014_2	Thap Muoi	5	300	159			46.59																																	2.93	2.93
75-014	75-014_2	Thap Muoi	6	280	176.4			54.51																																	3.09	3.09
75-014	75-014_2	Thap Muoi	7	250	172.5			55.03																																	3.19	3.19
75-014	75-014_2	Thap Muoi	8	250	185			64.2																																	3.47	3.47
75-014	75-014_2	Thap Muoi	9	250	207.5			77.61																																	3.74	3.74
75-014	75-014_2	Thap Muoi	10	250	227.5			91.46																																	4.02	4.02
75-014	75-014_2	Thap Muoi	11	250	250			105.75																																	4.23	4.23
75-014	75-014_2	Thap Muoi	12	250	285			126.54																																	4.44	4.44
75-014	75-014_2	Thap Muoi	13	250	330			153.12																																	4.64	4.64
75-014	75-014_2	Thap Muoi	14	250	350			169.75																																	4.85	4.85
75-014	75-014_2	Thap Muoi	15	250	355			182.12																																	5.13	5.13
75-014	75-014_2	Thap Muoi	16	250	377.5			201.59																																	5.34	5.34
75-014	75-014_2	Thap Muoi	17	250	390			213.33																																	5.47	5.47
75-014	75-014_2	Thap Muoi	18	250	400			224.4																																	5.61	5.61
75-014	75-014_2	Thap Muoi	19	50	84.5
75-014	75-014_2	Thap Muoi	20	49	86.73
75-014	75-014_2	Thap Muoi	21	49	88.69
75-014	75-014_2	Thap Muoi	22	49	91.14
75-014	75-014_2	Thap Muoi	23	49	94.57
75-014	75-014_2	Thap Muoi	24	49	98
75-014	75-014_2	Thap Muoi	25	49	102.9
75-015	75-015_1	Thap Muoi	1	204	10.2	0.79																																			0.77	0.77
75-015	75-015_1	Thap Muoi	2	200	18							2.5																																					6.95
75-015	75-015_1	Thap Muoi	3	184	46							8.88																																					9.65
75-015	75-015_1	Thap Muoi	4	183	78.69							19.36																																					12.3
75-015	75-015_1	Thap Muoi	5	183	96.99								28.42																																				2.93
75-015	75-015_1	Thap Muoi	6	183	115.29								35.62																																				3.09
75-015	75-015_1	Thap Muoi	7	181	124.89								39.84																																				3.19
75-015	75-015_1	Thap Muoi	8	179	132.46								45.96																																				3.47
75-015	75-015_1	Thap Muoi	9	174	144.42								54.01																																				3.74
75-015	75-015_1	Thap Muoi	10	174	158.34								63.65																																				4.02
75-015	75-015_1	Thap Muoi	11	174	174								73.6																																				4.23
75-015	75-015_1	Thap Muoi	12	174	198.36								88.07																																				4.44
75-015	75-015_1	Thap Muoi	13	174	229.68								106.57																																				4.64
75-015	75-015_1	Thap Muoi	14	174	243.6								118.15																																				4.85
75-015	75-015_1	Thap Muoi	15	174	247.08								126.75																																				5.13
75-015	75-015_1	Thap Muoi	16	18	27.18								14.51																																				5.34
75-015	75-015_1	Thap Muoi	17	18	28.08								15.36																																				5.47
75-015	75-015_2	Thap Muoi	1	102	5.1	0.39																																			0.77	0.77
75-015	75-015_2	Thap Muoi	2	100	9	1.25																																			1.39	1.39
75-015	75-015_2	Thap Muoi	3	95	23.75							4.58																																					9.65
75-015	75-015_2	Thap Muoi	4	95	40.85							10.05																																					12.3
75-015	75-015_2	Thap Muoi	5	95	50.35							14.75																																					14.65
75-015	75-015_2	Thap Muoi	6	90	56.7							17.52																																					15.45
75-015	75-015_2	Thap Muoi	7	90	62.1								19.81																																				3.19
75-015	75-015_2	Thap Muoi	8	90	66.6								23.11																																				3.47
75-015	75-015_2	Thap Muoi	9	85	70.55								26.39																																				3.74
75-015	75-015_2	Thap Muoi	10	83	75.53								30.36																																				4.02
75-015	75-015_2	Thap Muoi	11	83	83								35.11																																				4.23
75-015	75-015_2	Thap Muoi	12	83	94.62								42.01																																				4.44
75-015	75-015_2	Thap Muoi	13	80	105.6								49																																				4.64
75-015	75-015_2	Thap Muoi	14	80	112								54.32																																				4.85
75-015	75-015_2	Thap Muoi	15	35	49.7								25.5																																				5.13
75-016	75-016_1	Thap Muoi	1	200	10	0.77																																			0.77	0.77
75-016	75-016_1	Thap Muoi	2	200	18
75-016	75-016_1	Thap Muoi	3	200	50
75-016	75-016_1	Thap Muoi	4	200	86			21.16																																	2.46	2.46
75-016	75-016_1	Thap Muoi	5	196	103.88			30.44																																	2.93	2.93
75-016	75-016_1	Thap Muoi	6	196	123.48			38.16																																	3.09	3.09
75-016	75-016_1	Thap Muoi	7	170	117.3			37.42																																	3.19	3.19
75-016	75-016_1	Thap Muoi	8	170	125.8			43.65																																	3.47	3.47
75-016	75-016_1	Thap Muoi	9	170	141.1			52.77																																	3.74	3.74
75-016	75-016_1	Thap Muoi	10	170	154.7			62.19																																	4.02	4.02
75-016	75-016_1	Thap Muoi	11	170	170			71.91																																	4.23	4.23
75-016	75-016_1	Thap Muoi	12	170	193.8			86.05																																	4.44	4.44
75-016	75-016_1	Thap Muoi	13	170	224.4			104.12																																	4.64	4.64
75-016	75-016_1	Thap Muoi	14	170	238			115.43																																	4.85	4.85
75-016	75-016_1	Thap Muoi	15	170	241.4			123.84																																	5.13	5.13
75-016	75-016_1	Thap Muoi	16	110	166.1			88.7																																	5.34	5.34
75-016	75-016_1	Thap Muoi	17	110	171.6			93.87																																	5.47	5.47
75-016	75-016_1	Thap Muoi	18	110	176			98.74																																	5.61	5.61
75-016	75-016_1	Thap Muoi	19	70	118.3			67.19																																	5.68	5.68
75-016	75-016_1	Thap Muoi	20	70	123.9			72.98																																	5.89	5.89
75-016	75-016_1	Thap Muoi	21	70	126.7			83.37																																	6.58	6.58
75-016	75-016_2	Thap Muoi	1	200	10	0.77																																			0.77	0.77
75-016	75-016_2	Thap Muoi	2	200	18																																				0.7	0.7
75-016	75-016_2	Thap Muoi	3	200	50	9.65																																			1.93	1.93
75-016	75-016_2	Thap Muoi	4	200	86			21.16																																	2.46	2.46
75-016	75-016_2	Thap Muoi	5	196	103.88																																				1.47	1.47
75-016	75-016_2	Thap Muoi	6	196	123.48			38.16																																	3.09	3.09
75-016	75-016_2	Thap Muoi	7	196	135.24			43.14																																	3.19	3.19
75-016	75-016_2	Thap Muoi	8	196	145.04			50.33																																	3.47	3.47
75-016	75-016_2	Thap Muoi	9	196	162.68			60.84																																	3.74	3.74
75-016	75-016_2	Thap Muoi	10	191	173.81			69.87																																	4.02	4.02
75-016	75-016_2	Thap Muoi	11	191	191			80.79																																	4.23	4.23
75-016	75-016_2	Thap Muoi	12	191	217.74			96.68																																	4.44	4.44
75-016	75-016_2	Thap Muoi	13	191	252.12			116.98																																	4.64	4.64
75-016	75-016_2	Thap Muoi	14	176	246.4			119.5																																	4.85	4.85
75-016	75-016_2	Thap Muoi	15	176	249.92
75-018	75-018_1	Thap Muoi	1	337	16.85							1.3																																					3.85
75-018	75-018_1	Thap Muoi	2	335	30.15							4.19																																					6.95
75-018	75-018_1	Thap Muoi	3	335	83.75							16.16																																					9.65
75-018	75-018_1	Thap Muoi	4	334	143.62																																												6.15
75-018	75-018_1	Thap Muoi	5	270	143.1
75-018	75-018_1	Thap Muoi	6	270	170.1
75-018	75-018_1	Thap Muoi	7	270	186.3
75-018	75-018_1	Thap Muoi	8	270	199.8
75-018	75-018_1	Thap Muoi	9	100	83
75-018	75-018_1	Thap Muoi	10	100	91
75-018	75-018_1	Thap Muoi	11	100	100
75-018	75-018_1	Thap Muoi	12	100	114
75-018	75-018_1	Thap Muoi	13	100	132
75-018	75-018_1	Thap Muoi	14	100	140
75-018	75-018_1	Thap Muoi	15	100	142
75-018	75-018_1	Thap Muoi	16	100	151
75-018	75-018_1	Thap Muoi	17	100	156
75-018	75-018_1	Thap Muoi	18	100	160
75-018	75-018_1	Thap Muoi	19	100	169
75-018	75-018_1	Thap Muoi	20	100	177
75-018	75-018_1	Thap Muoi	21	100	181
75-018	75-018_1	Thap Muoi	22	100	186
75-018	75-018_1	Thap Muoi	23	80	154.4
75-019	75-019_1	Thap Muoi	1	102	5.1	0.39																																			0.77	0.77
75-019	75-019_1	Thap Muoi	2	97	8.73	1.21																																			1.39	1.39
75-019	75-019_1	Thap Muoi	3	96	24	4.63																																			1.93	1.93
75-019	75-019_1	Thap Muoi	4	96	41.28	10.15																																			2.46	2.46
75-019	75-019_1	Thap Muoi	5	95	50.35	14.75																																			2.93	2.93
75-019	75-019_1	Thap Muoi	6	93	58.59	18.1																																			3.09	3.09
75-019	75-019_1	Thap Muoi	7	92	63.48
75-019	75-019_1	Thap Muoi	8	91	67.34
75-019	75-019_1	Thap Muoi	9	91	75.53
75-019	75-019_1	Thap Muoi	10	91	82.81
75-019	75-019_1	Thap Muoi	11	91	91
75-019	75-019_1	Thap Muoi	12	91	103.74
75-019	75-019_1	Thap Muoi	13	91	120.12
75-019	75-019_1	Thap Muoi	14	91	127.4
75-019	75-019_1	Thap Muoi	15	9	12.78
75-019	75-019_2	Thap Muoi	1	300	15	1.16																																			0.77	0.77
75-019	75-019_2	Thap Muoi	2	300	27	3.75																																			1.39	1.39
75-019	75-019_2	Thap Muoi	3	298	74.5	14.38																																			1.93	1.93
75-019	75-019_2	Thap Muoi	4	295	126.85																																				2.46	2.46
75-019	75-019_2	Thap Muoi	5	295	156.35			45.81																																	2.93	2.93
75-019	75-019_2	Thap Muoi	6	295	185.85			57.43																																	3.09	3.09
75-019	75-019_2	Thap Muoi	7	294	202.86			64.71																																	3.19	3.19
75-019	75-019_2	Thap Muoi	8	294	217.56			75.49																																	3.47	3.47
75-019	75-019_2	Thap Muoi	9	284	235.72			88.16																																	3.74	3.74
75-019	75-019_2	Thap Muoi	10	284	258.44			103.89																																	4.02	4.02
75-019	75-019_2	Thap Muoi	11	283	283			119.71																																	4.23	4.23
75-019	75-019_2	Thap Muoi	12	281	320.34			142.23																																	4.44	4.44
75-019	75-019_2	Thap Muoi	13	280	369.6			171.49																																	4.64	4.64
75-019	75-019_2	Thap Muoi	14	265	371			179.94																																	4.85	4.85
75-019	75-019_2	Thap Muoi	15	260	369.2			189.4																																	5.13	5.13
75-019	75-019_2	Thap Muoi	16	250	377.5			201.59																																	5.34	5.34
75-019	75-019_2	Thap Muoi	17	200	312			170.66																																	5.47	5.47
75-020	75-020_1	Thap Muoi	1	700	35	2.7																																			0.77	0.77
75-020	75-020_1	Thap Muoi	2	695	62.55	8.69																																			1.39	1.39
75-020	75-020_1	Thap Muoi	3	690	172.5	33.29																																			1.93	1.93
75-020	75-020_1	Thap Muoi	4	690	296.7			72.99																																	2.46	2.46
75-020	75-020_1	Thap Muoi	5	687	364.11			106.68																																	2.93	2.93
75-020	75-020_1	Thap Muoi	6	684	430.92			133.15																																	3.09	3.09
75-020	75-020_1	Thap Muoi	7	654	451.26			143.95																																	3.19	3.19
75-020	75-020_1	Thap Muoi	8	654	483.96			167.93																																	3.47	3.47
75-020	75-020_1	Thap Muoi	9	652	541.16			202.39																																	3.74	3.74
75-020	75-020_1	Thap Muoi	10	650	591.5			237.78																																	4.02	4.02
75-020	75-020_1	Thap Muoi	11	640	640
75-020	75-020_1	Thap Muoi	12	640	729.6
75-020	75-020_1	Thap Muoi	13	640	844.8
75-020	75-020_1	Thap Muoi	14	636	890.4
75-020	75-020_1	Thap Muoi	15	436	619.12
75-020	75-020_1	Thap Muoi	16	286	431.86
75-020	75-020_1	Thap Muoi	17	186	290.16
75-020	75-020_1	Thap Muoi	18	86	137.6
75-020	75-020_2	Thap Muoi	1	300	15	1.16																																			0.77	0.77
75-020	75-020_2	Thap Muoi	2	290	26.1	3.63																																			1.39	1.39
75-020	75-020_2	Thap Muoi	3	290	72.5	13.99																																			1.93	1.93
75-020	75-020_2	Thap Muoi	4	290	124.7		30.68																																		2.46	2.46
75-020	75-020_2	Thap Muoi	5	290	153.7		45.03																																		2.93	2.93
75-020	75-020_2	Thap Muoi	6	290	182.7		56.45																																		3.09	3.09
75-020	75-020_2	Thap Muoi	7	290	200.1		63.83																																		3.19	3.19
75-020	75-020_2	Thap Muoi	8	290	214.6		74.47																																		3.47	3.47
75-020	75-020_2	Thap Muoi	9	290	240.7		90.02																																		3.74	3.74
75-020	75-020_2	Thap Muoi	10	290	263.9			106.09																																	4.02	4.02
75-020	75-020_2	Thap Muoi	11	290	290			122.67																																	4.23	4.23
75-020	75-020_2	Thap Muoi	12	290	330.6			146.79																																	4.44	4.44
75-020	75-020_2	Thap Muoi	13	290	382.8			177.62																																	4.64	4.64
75-020	75-020_2	Thap Muoi	14	290	406			196.91																																	4.85	4.85
75-020	75-020_2	Thap Muoi	15	290	411.8			211.25																																	5.13	5.13
75-020	75-020_2	Thap Muoi	16	290	437.9			233.84																																	5.34	5.34
75-020	75-020_2	Thap Muoi	17	290	452.4			247.46																																	5.47	5.47
75-020	75-020_2	Thap Muoi	18	290	464
75-020	75-020_2	Thap Muoi	19	285	481.65
75-020	75-020_2	Thap Muoi	20	245	433.65
75-021	75-021_1	Thap Muoi	1	600	30	2.31																																			0.77	0.77
75-021	75-021_1	Thap Muoi	2	530	47.7	6.63																																			1.39	1.39
75-021	75-021_1	Thap Muoi	3	530	132.5	25.57																																			1.93	1.93
75-021	75-021_1	Thap Muoi	4	530	227.9	56.06																																			2.46	2.46
75-021	75-021_1	Thap Muoi	5	528	279.84																																				2.93	2.93
75-021	75-021_1	Thap Muoi	6	481	303.03			93.64																																	3.09	3.09
75-021	75-021_1	Thap Muoi	7	480	331.2			105.65																																	3.19	3.19
75-021	75-021_1	Thap Muoi	8	480	355.2			123.25																																	3.47	3.47
75-021	75-021_1	Thap Muoi	9	480	398.4			149																																	3.74	3.74
75-021	75-021_1	Thap Muoi	10	478	434.98			174.86																																	4.02	4.02
75-021	75-021_1	Thap Muoi	11	478	478			202.19																																	4.23	4.23
75-021	75-021_1	Thap Muoi	12	478	544.92			241.94																																	4.44	4.44
75-021	75-021_1	Thap Muoi	13	478	630.96			292.77																																	4.64	4.64
75-021	75-021_1	Thap Muoi	14	477	667.8			323.88																																	4.85	4.85
75-021	75-021_1	Thap Muoi	15	477	677.34			347.48																																	5.13	5.13
75-021	75-021_1	Thap Muoi	16	477	720.27			384.62																																	5.34	5.34
75-021	75-021_1	Thap Muoi	17	476	742.56			406.18																																	5.47	5.47
75-021	75-021_1	Thap Muoi	18	474	758.4			425.46																																	5.61	5.61
75-021	75-021_1	Thap Muoi	19	444	750.36			426.2																																	5.68	5.68
75-021	75-021_1	Thap Muoi	20	217	384.09			226.23																																	5.89	5.89
75-021	75-021_2	Thap Muoi	1	511	25.55	1.97																																			0.77	0.77
75-021	75-021_2	Thap Muoi	2	478	43.02	5.98																																			1.39	1.39
75-021	75-021_2	Thap Muoi	3	475	118.75	22.92																																			1.93	1.93
75-021	75-021_2	Thap Muoi	4	472	202.96	49.93																																			2.46	2.46
75-021	75-021_2	Thap Muoi	5	460	243.8			71.43																																	2.93	2.93
75-021	75-021_2	Thap Muoi	6	458	288.54			89.16																																	3.09	3.09
75-021	75-021_2	Thap Muoi	7	458	316.02			100.81																																	3.19	3.19
75-021	75-021_2	Thap Muoi	8	458	338.92			117.61																																	3.47	3.47
75-021	75-021_2	Thap Muoi	9	456	378.48			141.55																																	3.74	3.74
75-021	75-021_2	Thap Muoi	10	455	414.05			166.45																																	4.02	4.02
75-021	75-021_2	Thap Muoi	11	455	455																																				2.12	2.12							10.58
75-021	75-021_2	Thap Muoi	12	454	517.56						229.8																																						22.2
75-021	75-021_2	Thap Muoi	13	454	599.28						278.07																																						23.2
75-021	75-021_2	Thap Muoi	14	454	635.6						308.27																																						24.25
75-021	75-021_2	Thap Muoi	15	453	643.26						329.99																																						25.65
75-021	75-021_2	Thap Muoi	16	453	684.03						365.27																																						26.7
75-021	75-021_2	Thap Muoi	17	453	706.68						386.55																																						27.35
75-021	75-021_2	Thap Muoi	18	453	724.8						406.61																																						28.05
75-021	75-021_2	Thap Muoi	19	453	765.57						434.84																																						28.4
75-021	75-021_2	Thap Muoi	20	439	777.03						457.67																																						29.45
75-021	75-021_2	Thap Muoi	21	196	354.76						233.43																																						32.9
75-021	75-021_2	Thap Muoi	22	70	130.2						94.79																																						36.4
75-021	75-021_3	Thap Muoi	1	710	35.5	2.73																																			0.77	0.77
75-021	75-021_3	Thap Muoi	2	692	62.28	8.66																																			1.39	1.39
75-021	75-021_3	Thap Muoi	3	682	170.5																																				0.97	0.97							4.83
75-021	75-021_3	Thap Muoi	4	616	264.88																																				1.23	1.23							6.15
75-021	75-021_3	Thap Muoi	5	612	324.36						95.04																																						14.65
75-021	75-021_3	Thap Muoi	6	602	379.26						117.19																																						15.45
75-021	75-021_3	Thap Muoi	7	590	407.1						129.86																																						15.95
75-021	75-021_3	Thap Muoi	8	580	429.2						148.93																																						17.35
75-021	75-021_3	Thap Muoi	9	570	473.1						176.94																																						18.7
75-021	75-021_3	Thap Muoi	10	565	514.15						206.69																																						20.1
75-021	75-021_3	Thap Muoi	11	560	560						236.88																																						21.15
75-021	75-021_3	Thap Muoi	12	500	570						253.08																																						22.2
75-021	75-021_3	Thap Muoi	13	430	567.6						263.37																																						23.2
75-021	75-021_3	Thap Muoi	14	400	560						271.6																																						24.25
75-021	75-021_3	Thap Muoi	15	400	568						291.38																																						25.65
75-021	75-021_3	Thap Muoi	16	400	604						322.54																																						26.7
75-021	75-021_3	Thap Muoi	17	400	624						341.33																																						27.35
75-021	75-021_3	Thap Muoi	18	400	640						359.04																																						28.05
75-021	75-021_3	Thap Muoi	19	400	676						383.97																																						28.4
75-021	75-021_3	Thap Muoi	20	400	708						417.01																																						29.45
75-021	75-021_3	Thap Muoi	21	400	724						476.39																																						32.9
75-021	75-021_3	Thap Muoi	22	354	658.44						479.34																																						36.4
75-021	75-021_3	Thap Muoi	23	154	297.22						224.4																																						37.75
75-021	75-021_4	Thap Muoi	1	306	15.3																		1.18																										3.85
75-021	75-021_4	Thap Muoi	2	279	25.11																		3.49																										6.95
75-021	75-021_4	Thap Muoi	3	200	50																		9.65																										9.65
75-021	75-021_4	Thap Muoi	4	90	38.7																		9.52																										12.3
75-021	75-021_4	Thap Muoi	5	90	47.7						13.98																																						14.65
75-021	75-021_4	Thap Muoi	6	90	56.7						17.52																																						15.45
75-021	75-021_4	Thap Muoi	7	90	62.1						19.81																																						15.95
75-021	75-021_4	Thap Muoi	8	90	66.6						23.11																																						17.35
75-021	75-021_4	Thap Muoi	9	90	74.7						27.94																																						18.7
75-021	75-021_4	Thap Muoi	10	90	81.9						32.92																																						20.1
75-021	75-021_4	Thap Muoi	11	90	90						38.07																																						21.15
75-021	75-021_4	Thap Muoi	12	90	102.6						45.55																																						22.2
75-021	75-021_4	Thap Muoi	13	90	118.8						55.12																																						23.2
75-021	75-021_4	Thap Muoi	14	90	126						61.11																																						24.25
75-021	75-021_4	Thap Muoi	15	90	127.8						65.56																																						25.65
75-021	75-021_4	Thap Muoi	16	90	135.9						72.57																																						26.7
75-021	75-021_4	Thap Muoi	17	90	140.4						76.8																																						27.35
75-021	75-021_4	Thap Muoi	18	90	144						80.78																																						28.05
75-021	75-021_4	Thap Muoi	19	90	152.1						86.39																																						28.4
75-021	75-021_4	Thap Muoi	20	90	159.3						93.83																																						29.45
75-021	75-021_4	Thap Muoi	21	90	162.9						107.19																																						32.9
75-021	75-021_5	Thap Muoi	1	570	28.5																		2.19																										3.85
75-021	75-021_5	Thap Muoi	2	550	49.5																		6.88																										6.95
75-021	75-021_5	Thap Muoi	3	520	130																		25.09																										9.65
75-021	75-021_5	Thap Muoi	4	520	223.6																		55.01																										12.3
75-021	75-021_5	Thap Muoi	5	520	275.6						80.75																																						14.65
75-021	75-021_5	Thap Muoi	6	520	327.6						101.23																																						15.45
75-021	75-021_5	Thap Muoi	7	520	358.8						114.46																																						15.95
75-021	75-021_5	Thap Muoi	8	520	384.8			133.53																																	3.47	3.47
75-021	75-021_5	Thap Muoi	9	518	429.94			160.8																																	3.74	3.74
75-021	75-021_5	Thap Muoi	10	516	469.56			188.76																																	4.02	4.02
75-021	75-021_5	Thap Muoi	11	514	514						217.42																																						21.15
75-021	75-021_5	Thap Muoi	12	514	585.96						260.17																																						22.2
75-021	75-021_5	Thap Muoi	13	514	678.48						314.81																																						23.2
75-021	75-021_5	Thap Muoi	14	512	716.8						347.65																																						24.25
75-021	75-021_5	Thap Muoi	15	512	727.04						372.97																																						25.65
75-021	75-021_5	Thap Muoi	16	512	773.12						412.85																																						26.7
75-021	75-021_5	Thap Muoi	17	512	798.72						436.9																																						27.35
75-021	75-021_5	Thap Muoi	18	512	819.2						459.57																																						28.05
75-021	75-021_5	Thap Muoi	19	512	865.28						491.48																																						28.4
75-021	75-021_5	Thap Muoi	20	417	738.09						434.74																																						29.45
75-021	75-021_5	Thap Muoi	21	322	582.82						383.5																																						32.9
75-021	75-021_5	Thap Muoi	22	227	422.22						307.38																																						36.4
75-021	75-021_5	Thap Muoi	23	100	193						145.72																																						37.75
75-021	75-021_6	Thap Muoi	1	300	15																		1.16																										3.85
75-021	75-021_6	Thap Muoi	2	295	26.55																		3.69																										6.95
75-021	75-021_6	Thap Muoi	3	290	72.5																		13.99																										9.65
75-021	75-021_6	Thap Muoi	4	290	124.7																		30.68																										12.3
75-021	75-021_6	Thap Muoi	5	290	153.7																		45.03																										14.65
75-021	75-021_6	Thap Muoi	6	290	182.7																		56.45																										15.45
75-021	75-021_6	Thap Muoi	7	290	200.1																		63.83																										15.95
75-021	75-021_6	Thap Muoi	8	290	214.6																		74.47																										17.35
75-021	75-021_6	Thap Muoi	9	290	240.7																		90.02																										18.7
75-021	75-021_6	Thap Muoi	10	290	263.9																		106.09																										20.1
75-021	75-021_6	Thap Muoi	11	290	290																		122.67																										21.15
75-021	75-021_6	Thap Muoi	12	290	330.6																		146.79																										22.2
75-021	75-021_6	Thap Muoi	13	290	382.8																		177.62																										23.2
75-021	75-021_6	Thap Muoi	14	290	406																		196.91																										24.25
75-021	75-021_6	Thap Muoi	15	290	411.8																		211.25																										25.65
75-021	75-021_6	Thap Muoi	16	290	437.9																		233.84																										26.7
75-021	75-021_6	Thap Muoi	17	290	452.4																		247.46																										27.35
75-021	75-021_6	Thap Muoi	18	290	464																		260.3																										28.05
75-021	75-021_6	Thap Muoi	19	290	490.1																		278.38																										56.8
75-021	75-021_7	Thap Muoi	1	306	15.3																		1.18																										3.85
75-021	75-021_7	Thap Muoi	2	298	26.82																		3.73																										6.95
75-021	75-021_7	Thap Muoi	3	298	74.5						14.38																																						9.65
75-021	75-021_7	Thap Muoi	4	298	128.14						31.52																																						12.3
75-021	75-021_7	Thap Muoi	5	298	157.94						46.28																																						14.65
75-021	75-021_7	Thap Muoi	6	298	187.74						58.01																																						15.45
75-021	75-021_7	Thap Muoi	7	298	205.62						65.59																																						15.95
75-021	75-021_7	Thap Muoi	8	298	220.52						76.52																																						17.35
75-021	75-021_7	Thap Muoi	9	298	247.34						92.51																																						18.7
75-021	75-021_7	Thap Muoi	10	298	271.18						109.01																																						20.1
75-021	75-021_7	Thap Muoi	11	298	298						126.05																																						21.15
75-021	75-021_7	Thap Muoi	12	298	339.72						150.84																																						22.2
75-021	75-021_7	Thap Muoi	13	298	393.36						182.52																																						23.2
75-021	75-021_7	Thap Muoi	14	298	417.2						202.34																																						24.25
75-021	75-021_7	Thap Muoi	15	298	423.16						217.08																																						25.65
75-021	75-021_8	Thap Muoi	1	300	15																		1.16																										3.85
75-021	75-021_8	Thap Muoi	2	290	26.1																		3.63																										6.95
75-021	75-021_8	Thap Muoi	3	290	72.5																		13.99																										9.65
75-021	75-021_8	Thap Muoi	4	290	124.7						30.68																																						12.3
75-021	75-021_8	Thap Muoi	5	290	153.7						45.03																																						14.65
75-021	75-021_8	Thap Muoi	6	290	182.7						56.45																																						15.45
75-021	75-021_8	Thap Muoi	7	290	200.1						63.83																																						15.95
75-021	75-021_8	Thap Muoi	8	290	214.6						74.47																																						17.35
75-021	75-021_8	Thap Muoi	9	290	240.7						90.02																																						18.7
75-021	75-021_8	Thap Muoi	10	290	263.9						106.09																																						20.1
75-021	75-021_8	Thap Muoi	11	290	290						122.67																																						21.15
75-021	75-021_8	Thap Muoi	12	290	330.6						146.79																																						22.2
75-021	75-021_8	Thap Muoi	13	290	382.8						177.62																																						23.2
75-021	75-021_8	Thap Muoi	14	290	406						196.91																																						24.25
75-021	75-021_8	Thap Muoi	15	218	309.56						158.8																																						25.65
75-021	75-021_8	Thap Muoi	16	218	329.18						175.78																																						26.7
75-021	75-021_8	Thap Muoi	17	130	202.8						110.93																																						27.35
75-021	75-021_8	Thap Muoi	18	65	104						58.34																																						28.05
75-021	75-021_9	Thap Muoi	1	306	15.3																		1.18																										3.85
75-021	75-021_9	Thap Muoi	2	280	25.2																		3.5																										6.95
75-021	75-021_9	Thap Muoi	3	280	70																		13.51																										9.65
75-021	75-021_9	Thap Muoi	4	280	120.4						29.62																																						12.3
75-021	75-021_9	Thap Muoi	5	280	148.4						43.48																																						14.65
75-021	75-021_9	Thap Muoi	6	280	176.4						54.51																																						15.45
75-021	75-021_9	Thap Muoi	7	280	193.2						61.63																																						15.95
75-021	75-021_9	Thap Muoi	8	280	207.2						71.9																																						17.35
75-021	75-021_9	Thap Muoi	9	280	232.4						86.92																																						18.7
75-021	75-021_9	Thap Muoi	10	280	254.8						102.43																																						20.1
75-021	75-021_9	Thap Muoi	11	280	280						118.44																																						21.15
75-021	75-021_9	Thap Muoi	12	280	319.2						141.72																																						22.2
75-021	75-021_9	Thap Muoi	13	280	369.6						171.49																																						23.2
75-021	75-021_9	Thap Muoi	14	280	392						190.12																																						24.25
75-021	75-021_9	Thap Muoi	15	280	397.6						203.97																																						25.65
75-021	75-021_9	Thap Muoi	16	280	422.8						225.78																																						26.7
75-021	75-021_9	Thap Muoi	17	280	436.8						238.93																																						27.35
75-021	75-021_9	Thap Muoi	18	100	160						89.76																																						28.05
75-022	75-022_1	Thap Muoi	1	400	20	1.54																																			0.77	0.77
75-022	75-022_1	Thap Muoi	2	398	35.82	4.98																																			1.39	1.39
75-022	75-022_1	Thap Muoi	3	357	89.25	17.23																																			1.93	1.93
75-022	75-022_1	Thap Muoi	4	350	150.5	37.02																																			2.46	2.46
75-022	75-022_1	Thap Muoi	5	340	180.2			52.8																																	2.93	2.93
75-022	75-022_1	Thap Muoi	6	320	201.6			62.29																																	3.09	3.09
75-022	75-022_1	Thap Muoi	7	306	211.14			67.35																																	3.19	3.19
75-022	75-022_1	Thap Muoi	8	300	222			77.03																																	3.47	3.47
75-022	75-022_1	Thap Muoi	9	300	249			93.13																																	3.74	3.74
75-022	75-022_1	Thap Muoi	10	300	273			109.75																																	4.02	4.02
75-022	75-022_1	Thap Muoi	11	300	300			126.9																																	4.23	4.23
75-022	75-022_1	Thap Muoi	12	300	342			151.85																																	4.44	4.44
75-022	75-022_1	Thap Muoi	13	300	396			183.74																																	4.64	4.64
75-022	75-022_1	Thap Muoi	14	300	420			203.7																																	4.85	4.85
75-022	75-022_1	Thap Muoi	15	300	426			218.54																																	5.13	5.13
75-022	75-022_1	Thap Muoi	16	300	453			241.9																																	5.34	5.34
75-022	75-022_1	Thap Muoi	17	300	468			256																																	5.47	5.47
75-022	75-022_1	Thap Muoi	18	300	480			269.28																																	5.61	5.61
75-022	75-022_1	Thap Muoi	19	300	507			287.98																																	5.68	5.68
75-022	75-022_1	Thap Muoi	20	300	531			312.76																																	5.89	5.89
75-022	75-022_1	Thap Muoi	21	87	157.47
75-022	75-022_2	Thap Muoi	1	714	35.7	2.75																																			0.77	0.77
75-022	75-022_2	Thap Muoi	2	707	63.63	8.84																																			1.39	1.39
75-022	75-022_2	Thap Muoi	3	662	165.5	31.94																																			1.93	1.93
75-022	75-022_2	Thap Muoi	4	650	279.5	68.76																																			2.46	2.46
75-022	75-022_2	Thap Muoi	5	630	333.9			97.83																																	2.93	2.93
75-022	75-022_2	Thap Muoi	6	613	386.19			119.33																																	3.09	3.09
75-022	75-022_2	Thap Muoi	7	602	415.38			132.51																																	3.19	3.19
75-022	75-022_2	Thap Muoi	8	595	440.3			152.78																																	3.47	3.47
75-022	75-022_2	Thap Muoi	9	592	491.36			183.77																																	3.74	3.74
75-022	75-022_2	Thap Muoi	10	592	538.72			216.57																																	4.02	4.02
75-022	75-022_2	Thap Muoi	11	589	589			249.15																																	4.23	4.23
75-022	75-022_2	Thap Muoi	12	585	666.9			296.1																																	4.44	4.44
75-022	75-022_2	Thap Muoi	13	584	770.88			357.69																																	4.64	4.64
75-022	75-022_2	Thap Muoi	14	580	812			393.82																																	4.85	4.85
75-022	75-022_2	Thap Muoi	15	578	820.76			421.05																																	5.13	5.13
75-022	75-022_2	Thap Muoi	16	575	868.25			463.65																																	5.34	5.34
75-022	75-022_2	Thap Muoi	17	573	893.88			488.95																																	5.47	5.47
75-022	75-022_2	Thap Muoi	18	488	780.8			438.03																																	5.61	5.61
75-022	75-022_2	Thap Muoi	19	309	522.21			296.62																																	5.68	5.68
75-022	75-022_2	Thap Muoi	20	138	244.26			143.87																																	5.89	5.89
75-022	75-022_3	Thap Muoi	1	612	30.6	2.36																																			0.77	0.77
75-022	75-022_3	Thap Muoi	2	597	53.73	7.47																																			1.39	1.39
75-022	75-022_3	Thap Muoi	3	590	147.5	28.47																																			1.93	1.93
75-022	75-022_3	Thap Muoi	4	560	240.8	59.24																																			2.46	2.46
75-022	75-022_3	Thap Muoi	5	510	270.3		79.2																																		2.93	2.93
75-022	75-022_3	Thap Muoi	6	490	308.7			95.39																																	3.09	3.09
75-022	75-022_3	Thap Muoi	7	470	324.3			103.45																																	3.19	3.19
75-022	75-022_3	Thap Muoi	8	460	340.4			118.12																																	3.47	3.47
75-022	75-022_3	Thap Muoi	9	450	373.5			139.69																																	3.74	3.74
75-022	75-022_3	Thap Muoi	10	445	404.95			162.79																																	4.02	4.02
75-022	75-022_3	Thap Muoi	11	440	440			186.12																																	4.23	4.23
75-022	75-022_3	Thap Muoi	12	440	501.6			222.71																																	4.44	4.44
75-022	75-022_3	Thap Muoi	13	440	580.8			269.49																																	4.64	4.64
75-022	75-022_3	Thap Muoi	14	440	616			298.76																																	4.85	4.85
75-022	75-022_3	Thap Muoi	15	440	624.8			320.52																																	5.13	5.13
75-022	75-022_3	Thap Muoi	16	440	664.4			354.79																																	5.34	5.34
75-022	75-022_3	Thap Muoi	17	440	686.4			375.46																																	5.47	5.47
75-022	75-022_3	Thap Muoi	18	167	267.2			149.9																																	5.61	5.61
75-022	75-022_4	Thap Muoi	1	612	30.6	2.36																																			0.77	0.77
75-022	75-022_4	Thap Muoi	2	566	50.94	7.08																																			1.39	1.39
75-022	75-022_4	Thap Muoi	3	551	137.75	26.59																																			1.93	1.93
75-022	75-022_4	Thap Muoi	4	531	228.33			56.17																																	2.46	2.46
75-022	75-022_4	Thap Muoi	5	506	268.18			78.58																																	2.93	2.93
75-022	75-022_4	Thap Muoi	6	476	299.88			92.66																																	3.09	3.09
75-022	75-022_4	Thap Muoi	7	461	318.09			101.47																																	3.19	3.19
75-022	75-022_4	Thap Muoi	8	446	330.04			114.52																																	3.47	3.47
75-022	75-022_4	Thap Muoi	9	426	353.58			132.24																																	3.74	3.74
75-022	75-022_4	Thap Muoi	10	422	384.02			154.38																																	4.02	4.02
75-022	75-022_4	Thap Muoi	11	420	420			177.66																																	4.23	4.23
75-022	75-022_4	Thap Muoi	12	420	478.8			212.59																																	4.44	4.44
75-022	75-022_4	Thap Muoi	13	415	547.8			254.18																																	4.64	4.64
75-022	75-022_4	Thap Muoi	14	410	574			278.39																																	4.85	4.85
75-022	75-022_4	Thap Muoi	15	410	582.2			298.67																																	5.13	5.13
75-022	75-022_4	Thap Muoi	16	408	616.08			328.99																																	5.34	5.34
75-022	75-022_4	Thap Muoi	17	406	633.36			346.45																																	5.47	5.47
75-022	75-022_4	Thap Muoi	18	406	649.6			364.43																																	5.61	5.61
75-022	75-022_4	Thap Muoi	19	247	417.43			237.1																																	5.68	5.68
75-022	75-022_4	Thap Muoi	20	184	325.68			191.83																																	5.89	5.89
75-022	75-022_5	Thap Muoi	1	306	15.3	1.18																																			0.77	0.77
75-022	75-022_5	Thap Muoi	2	300	27	3.75																																			1.39	1.39
75-022	75-022_5	Thap Muoi	3	295	73.75	14.23																																			1.93	1.93
75-022	75-022_5	Thap Muoi	4	295	126.85	31.21																																			2.46	2.46
75-022	75-022_5	Thap Muoi	5	283	149.99			43.95																																	2.93	2.93
75-022	75-022_5	Thap Muoi	6	283	178.29			55.09																																	3.09	3.09
75-022	75-022_5	Thap Muoi	7	280	193.2			61.63																																	3.19	3.19
75-022	75-022_5	Thap Muoi	8	277	204.98			71.13																																	3.47	3.47
75-022	75-022_5	Thap Muoi	9	276	229.08			85.68																																	3.74	3.74
75-022	75-022_5	Thap Muoi	10	276	251.16			100.97																																	4.02	4.02
75-022	75-022_5	Thap Muoi	11	276	276			116.75																																	4.23	4.23
75-022	75-022_5	Thap Muoi	12	276	314.64			139.7																																	4.44	4.44
75-022	75-022_5	Thap Muoi	13	276	364.32			169.04																																	4.64	4.64
75-022	75-022_5	Thap Muoi	14	276	386.4			187.4																																	4.85	4.85
75-022	75-022_5	Thap Muoi	15	276	391.92			201.05																																	5.13	5.13
75-022	75-022_5	Thap Muoi	16	276	416.76			222.55																																	5.34	5.34
75-022	75-022_5	Thap Muoi	17	276	430.56			235.52																																	5.47	5.47
75-022	75-022_5	Thap Muoi	18	182	291.2			163.36																																	5.61	5.61
75-022	75-022_5	Thap Muoi	19	105	177.45			100.79																																	5.68	5.68
75-023	75-023_1	Thap Muoi	1	230	11.5	0.89																																			0.77	0.77
75-023	75-023_1	Thap Muoi	2	220	19.8																																				0.7	0.7							3.48
75-023	75-023_1	Thap Muoi	3	218	54.5																				10.52																								9.65
75-023	75-023_1	Thap Muoi	4	217	93.31																				22.95																								12.3
75-023	75-023_1	Thap Muoi	5	215	113.95																					33.39																							14.65
75-023	75-023_1	Thap Muoi	6	215	135.45																					41.85																							15.45
75-023	75-023_1	Thap Muoi	7	208	143.52																					45.78																							15.95
75-023	75-023_1	Thap Muoi	8	208	153.92																					53.41																							17.35
75-023	75-023_1	Thap Muoi	9	203	168.49																					63.02																							18.7
75-023	75-023_1	Thap Muoi	10	203	184.73																					74.26																							20.1
75-023	75-023_1	Thap Muoi	11	199	199																					84.18																							21.15
75-023	75-023_1	Thap Muoi	12	195	222.3																																												11.1
75-023	75-023_1	Thap Muoi	13	193	254.76																																												11.6
75-023	75-023_1	Thap Muoi	14	183	256.2						124.26																																						24.25
75-023	75-023_1	Thap Muoi	15	113	160.46						82.32																																						25.65
75-023	75-023_1	Thap Muoi	16	53	80.03						42.74																																						26.7
75-023	75-023_1	Thap Muoi	17	16	24.96
75-025	75-025_1	Thap Muoi	1	300	15
75-025	75-025_1	Thap Muoi	2	296	26.64
75-025	75-025_1	Thap Muoi	3	293	73.25
75-025	75-025_1	Thap Muoi	4	276	118.68
75-025	75-025_1	Thap Muoi	5	276	146.28
75-025	75-025_1	Thap Muoi	6	270	170.1
75-025	75-025_1	Thap Muoi	7	263	181.47
75-025	75-025_1	Thap Muoi	8	263	194.62
75-025	75-025_1	Thap Muoi	9	263	218.29
75-025	75-025_1	Thap Muoi	10	263	239.33
75-025	75-025_1	Thap Muoi	11	263	263
75-025	75-025_1	Thap Muoi	12	263	299.82
75-025	75-025_1	Thap Muoi	13	263	347.16
75-025	75-025_1	Thap Muoi	14	263	368.2
75-025	75-025_1	Thap Muoi	15	263	373.46
75-025	75-025_1	Thap Muoi	16	263	397.13
75-025	75-025_1	Thap Muoi	17	263	410.28
75-025	75-025_1	Thap Muoi	18	173	276.8
75-025	75-025_1	Thap Muoi	19	133	224.77
75-025	75-025_1	Thap Muoi	20	63	111.51
75-025	75-025_1	Thap Muoi	21	43	77.83
75-026	75-026_1	Thap Muoi	1	250	12.5	0.96																																			0.77	0.77
75-026	75-026_1	Thap Muoi	2	250	22.5	3.13																																			1.39	1.39
75-026	75-026_1	Thap Muoi	3	250	62.5	12.06																																			1.93	1.93
75-026	75-026_1	Thap Muoi	4	250	107.5	26.45																																			2.46	2.46
75-026	75-026_1	Thap Muoi	5	246	130.38			38.2																																	2.93	2.93
75-026	75-026_1	Thap Muoi	6	246	154.98			47.89																																	3.09	3.09
75-026	75-026_1	Thap Muoi	7	238	164.22			52.39																																	3.19	3.19
75-026	75-026_1	Thap Muoi	8	238	176.12			61.11																																	3.47	3.47
75-026	75-026_1	Thap Muoi	9	238	197.54			73.88																																	3.74	3.74
75-026	75-026_1	Thap Muoi	10	238	216.58			87.07																																	4.02	4.02
75-026	75-026_1	Thap Muoi	11	238	238			100.67																																	4.23	4.23
75-026	75-026_1	Thap Muoi	12	238	271.32																																				2.22	2.22
75-026	75-026_1	Thap Muoi	13	238	314.16																																				2.32	2.32
75-026	75-026_1	Thap Muoi	14	238	333.2																																				2.43	2.43
75-026	75-026_1	Thap Muoi	15	238	337.96																																				2.57	2.57
75-026	75-026_1	Thap Muoi	16	386	582.86																																				2.67	2.67
75-026	75-026_1	Thap Muoi	17	90	140.4																																				2.74	2.74
75-026	75-026_1	Thap Muoi	18	89	142.4																																				2.81	2.81
75-026	75-026_1	Thap Muoi	19	89	150.41																																				2.84	2.84
75-026	75-026_2	Thap Muoi	1	100	5	0.39																																			0.77	0.77
75-026	75-026_2	Thap Muoi	2	99	8.91	1.24																																			1.39	1.39
75-026	75-026_2	Thap Muoi	3	99	24.75	4.78																																			1.93	1.93
75-026	75-026_2	Thap Muoi	4	99	42.57	10.47																																			2.46	2.46
75-026	75-026_2	Thap Muoi	5	99	52.47			15.37																																	2.93	2.93
75-026	75-026_2	Thap Muoi	6	99	62.37			19.27																																	3.09	3.09
75-026	75-026_2	Thap Muoi	7	99	68.31			21.79																																	3.19	3.19
75-026	75-026_2	Thap Muoi	8	99	73.26			25.42																																	3.47	3.47
75-026	75-026_2	Thap Muoi	9	99	82.17			30.73																																	3.74	3.74
75-026	75-026_2	Thap Muoi	10	99	90.09			36.22																																	4.02	4.02
75-026	75-026_2	Thap Muoi	11	99	99			41.88																																	4.23	4.23
75-026	75-026_2	Thap Muoi	12	99	112.86			50.11																																	4.44	4.44
75-026	75-026_2	Thap Muoi	13	98	129.36																																				2.32	2.32
75-026	75-026_2	Thap Muoi	14	98	137.2																																				2.43	2.43
75-026	75-026_2	Thap Muoi	15	98	139.16																																				2.57	2.57
75-026	75-026_2	Thap Muoi	16	98	147.98																																				2.67	2.67
75-026	75-026_2	Thap Muoi	17	98	152.88																																				2.74	2.74
75-027	75-027_1	Thap Muoi	1	714	35.7				2.75																																								3.85
75-027	75-027_1	Thap Muoi	2	680	61.2					8.51																																							6.95
75-027	75-027_1	Thap Muoi	3	680	170					32.81																																							9.65
75-027	75-027_1	Thap Muoi	4	680	292.4					71.93																																							12.3
75-027	75-027_1	Thap Muoi	5	678	359.34					105.29																																							14.65
75-027	75-027_1	Thap Muoi	6	670	422.1
75-027	75-027_1	Thap Muoi	7	670	462.3
75-027	75-027_1	Thap Muoi	8	670	495.8
75-027	75-027_1	Thap Muoi	9	670	556.1
75-027	75-027_1	Thap Muoi	10	670	609.7
75-027	75-027_1	Thap Muoi	11	670	670
75-027	75-027_1	Thap Muoi	12	670	763.8
75-027	75-027_1	Thap Muoi	13	670	884.4
75-027	75-027_1	Thap Muoi	14	670	938
75-027	75-027_1	Thap Muoi	15	670	951.4
75-027	75-027_1	Thap Muoi	16	670	1011.7
75-027	75-027_1	Thap Muoi	17	670	1045.2
75-027	75-027_1	Thap Muoi	18	470	752
75-027	75-027_1	Thap Muoi	19	220	371.8
75-027	75-027_1	Thap Muoi	20	110	194.7
75-027	75-027_2	Thap Muoi	1	450	22.5				1.73																																								3.85
75-027	75-027_2	Thap Muoi	2	400	36					5																																							6.95
75-027	75-027_2	Thap Muoi	3	395	98.75					19.06																																							9.65
75-027	75-027_2	Thap Muoi	4	390	167.7					41.25																																							12.3
75-027	75-027_2	Thap Muoi	5	390	206.7					60.56																																							14.65
75-027	75-027_2	Thap Muoi	6	370	233.1
75-027	75-027_2	Thap Muoi	7	370	255.3
75-027	75-027_2	Thap Muoi	8	370	273.8
75-027	75-027_2	Thap Muoi	9	370	307.1
75-027	75-027_2	Thap Muoi	10	370	336.7
75-027	75-027_2	Thap Muoi	11	368	368
75-027	75-027_2	Thap Muoi	12	365	416.1
75-027	75-027_2	Thap Muoi	13	365	481.8
75-027	75-027_2	Thap Muoi	14	365	511
75-027	75-027_2	Thap Muoi	15	365	518.3
75-027	75-027_2	Thap Muoi	16	365	551.15
75-027	75-027_2	Thap Muoi	17	365	569.4
75-027	75-027_2	Thap Muoi	18	365	584
75-027	75-027_2	Thap Muoi	19	250	422.5
75-027	75-027_2	Thap Muoi	20	130	230.1
75-027	75-027_3	Thap Muoi	1	700	35				2.7																																								3.85
75-027	75-027_3	Thap Muoi	2	695	62.55					8.69																																							6.95
75-027	75-027_3	Thap Muoi	3	690	172.5					33.29																																							9.65
75-027	75-027_3	Thap Muoi	4	690	296.7					72.99																																							12.3
75-027	75-027_3	Thap Muoi	5	690	365.7					107.15																																							14.65
75-027	75-027_3	Thap Muoi	6	687	432.81
75-027	75-027_3	Thap Muoi	7	685	472.65
75-027	75-027_3	Thap Muoi	8	685	506.9
75-027	75-027_3	Thap Muoi	9	685	568.55
75-027	75-027_3	Thap Muoi	10	685	623.35
75-027	75-027_3	Thap Muoi	11	683	683
75-027	75-027_3	Thap Muoi	12	683	778.62
75-027	75-027_3	Thap Muoi	13	683	901.56
75-027	75-027_3	Thap Muoi	14	683	956.2
75-027	75-027_3	Thap Muoi	15	683	969.86
75-027	75-027_3	Thap Muoi	16	683	1031.33
75-027	75-027_3	Thap Muoi	17	633	987.48
75-027	75-027_3	Thap Muoi	18	533	852.8
75-027	75-027_3	Thap Muoi	19	483	816.27
75-027	75-027_3	Thap Muoi	20	350	619.5
75-027	75-027_3	Thap Muoi	21	300	543
75-027	75-027_3	Thap Muoi	22	250	465
75-027	75-027_3	Thap Muoi	23	70	135.1
75-027	75-027_4	Thap Muoi	1	800	40				3.08																																								3.85
75-027	75-027_4	Thap Muoi	2	764	68.76					9.56																																							6.95
75-027	75-027_4	Thap Muoi	3	764	191					36.86																																							9.65
75-027	75-027_4	Thap Muoi	4	764	328.52					80.82																																							12.3
75-027	75-027_4	Thap Muoi	5	764	404.92					118.64																																							14.65
75-027	75-027_4	Thap Muoi	6	740	466.2
75-027	75-027_4	Thap Muoi	7	740	510.6
75-027	75-027_4	Thap Muoi	8	740	547.6
75-027	75-027_4	Thap Muoi	9	740	614.2
75-027	75-027_4	Thap Muoi	10	740	673.4
75-027	75-027_4	Thap Muoi	11	740	740
75-027	75-027_4	Thap Muoi	12	740	843.6
75-027	75-027_4	Thap Muoi	13	740	976.8
75-027	75-027_4	Thap Muoi	14	740	1036
75-027	75-027_4	Thap Muoi	15	740	1050.8
75-027	75-027_4	Thap Muoi	16	740	1117.4
75-027	75-027_4	Thap Muoi	17	740	1154.4
75-027	75-027_4	Thap Muoi	18	740	1184
75-027	75-027_4	Thap Muoi	19	380	642.2
75-027	75-027_5	Thap Muoi	1	750	37.5							2.89																																					3.85
75-027	75-027_5	Thap Muoi	2	730	65.7							9.13																																					6.95
75-027	75-027_5	Thap Muoi	3	728	182							35.13																																					9.65
75-027	75-027_5	Thap Muoi	4	724	311.32
75-027	75-027_5	Thap Muoi	5	724	383.72
75-027	75-027_5	Thap Muoi	6	724	456.12
75-027	75-027_5	Thap Muoi	7	724	499.56
75-027	75-027_5	Thap Muoi	8	724	535.76
75-027	75-027_5	Thap Muoi	9	724	600.92
75-027	75-027_5	Thap Muoi	10	724	658.84
75-027	75-027_5	Thap Muoi	11	724	724
75-027	75-027_5	Thap Muoi	12	724	825.36
75-027	75-027_5	Thap Muoi	13	720	950.4
75-027	75-027_5	Thap Muoi	14	720	1008
75-027	75-027_5	Thap Muoi	15	720	1022.4
75-027	75-027_5	Thap Muoi	16	720	1087.2
75-027	75-027_5	Thap Muoi	17	720	1123.2
75-027	75-027_5	Thap Muoi	18	605	968
75-027	75-027_5	Thap Muoi	19	435	735.15
75-027	75-027_5	Thap Muoi	20	285	504.45
75-027	75-027_5	Thap Muoi	21	145	262.45
75-027	75-027_5	Thap Muoi	22	24	44.64
75-027	75-027_6	Thap Muoi	1	970	48.5							3.73																																					3.85
75-027	75-027_6	Thap Muoi	2	964	86.76							12.06																																					6.95
75-027	75-027_6	Thap Muoi	3	964	241
75-027	75-027_6	Thap Muoi	4	964	414.52
75-027	75-027_6	Thap Muoi	5	964	510.92
75-027	75-027_6	Thap Muoi	6	954	601.02
75-027	75-027_6	Thap Muoi	7	954	658.26
75-027	75-027_6	Thap Muoi	8	954	705.96
75-027	75-027_6	Thap Muoi	9	954	791.82							296.14																																					18.7
75-027	75-027_6	Thap Muoi	10	954	868.14							348.99																																					20.1
75-027	75-027_6	Thap Muoi	11	954	954							403.54																																					21.15
75-027	75-027_6	Thap Muoi	12	954	1087.56							482.88																																					22.2
75-027	75-027_6	Thap Muoi	13	954	1259.28							584.31																																					23.2
75-027	75-027_6	Thap Muoi	14	954	1335.6							647.77																																					24.25
75-027	75-027_6	Thap Muoi	15	954	1354.68							694.95																																					25.65
75-027	75-027_6	Thap Muoi	16	954	1440.54							769.25																																					26.7
75-027	75-027_6	Thap Muoi	17	954	1488.24							814.07																																					27.35
75-027	75-027_6	Thap Muoi	18	944	1510.4							847.33																																					28.05
75-027	75-027_6	Thap Muoi	19	800	1352							767.94																																					28.4
75-027	75-027_6	Thap Muoi	20	530	938.1							552.54																																					29.45
75-027	75-027_6	Thap Muoi	21	260	470.6							309.65																																					32.9
75-027	75-027_7	Thap Muoi	1	459	22.95
75-027	75-027_7	Thap Muoi	2	453	40.77
75-027	75-027_7	Thap Muoi	3	450	112.5
75-027	75-027_7	Thap Muoi	4	440	189.2
75-027	75-027_7	Thap Muoi	5	440	233.2
75-027	75-027_7	Thap Muoi	6	440	277.2
75-027	75-027_7	Thap Muoi	7	440	303.6
75-027	75-027_7	Thap Muoi	8	440	325.6
75-027	75-027_7	Thap Muoi	9	440	365.2
75-027	75-027_7	Thap Muoi	10	440	400.4
75-027	75-027_7	Thap Muoi	11	440	440
75-027	75-027_7	Thap Muoi	12	440	501.6
75-027	75-027_7	Thap Muoi	13	440	580.8
75-027	75-027_7	Thap Muoi	14	440	616
75-027	75-027_7	Thap Muoi	15	440	624.8
75-027	75-027_7	Thap Muoi	16	440	664.4
75-027	75-027_7	Thap Muoi	17	440	686.4
75-027	75-027_7	Thap Muoi	18	440	704
75-027	75-027_7	Thap Muoi	19	440	743.6
75-027	75-027_7	Thap Muoi	20	370	654.9
75-027	75-027_7	Thap Muoi	21	310	561.1
75-027	75-027_7	Thap Muoi	22	175	325.5
75-028	75-028_1	Thap Muoi	1	204	10.2	0.79																																			0.77	0.77
75-028	75-028_1	Thap Muoi	2	202	18.18	2.53																																			1.39	1.39
75-028	75-028_1	Thap Muoi	3	188	47	9.07																																			1.93	1.93
75-028	75-028_1	Thap Muoi	4	180	77.4	19.04																																			2.46	2.46
75-028	75-028_1	Thap Muoi	5	160	84.8		24.85																																		2.93	2.93
75-028	75-028_1	Thap Muoi	6	150	94.5		29.2																																		3.09	3.09
75-028	75-028_1	Thap Muoi	7	150	103.5		33.02																																		3.19	3.19
75-028	75-028_1	Thap Muoi	8	149	110.26		38.26																																		3.47	3.47
75-028	75-028_1	Thap Muoi	9	149	123.67		46.25																																		3.74	3.74
75-028	75-028_1	Thap Muoi	10	149	135.59																																				2.01	2.01
75-028	75-028_1	Thap Muoi	11	149	149																																				2.12	2.12
75-028	75-028_1	Thap Muoi	12	149	169.86																																				2.22	2.22
75-028	75-028_1	Thap Muoi	13	149	196.68
75-028	75-028_1	Thap Muoi	14	149	208.6
75-028	75-028_1	Thap Muoi	15	149	211.58
75-028	75-028_1	Thap Muoi	16	149	224.99
75-028	75-028_1	Thap Muoi	17	122	190.32
75-028	75-028_1	Thap Muoi	18	15	24
75-028	75-028_2	Thap Muoi	1	204	10.2	0.79																																			0.77	0.77
75-028	75-028_2	Thap Muoi	2	194	17.46	2.43																																			1.39	1.39
75-028	75-028_2	Thap Muoi	3	170	42.5	8.2																																			1.93	1.93
75-028	75-028_2	Thap Muoi	4	155	66.65	16.4																																			2.46	2.46
75-028	75-028_2	Thap Muoi	5	130	68.9		20.19																																		2.93	2.93
75-028	75-028_2	Thap Muoi	6	102	64.26		19.86																																		3.09	3.09
75-028	75-028_2	Thap Muoi	7	102	70.38		22.45																																		3.19	3.19
75-028	75-028_2	Thap Muoi	8	98	72.52		25.16																																		3.47	3.47
75-028	75-028_2	Thap Muoi	9	96	79.68		29.8																																		3.74	3.74
75-028	75-028_2	Thap Muoi	10	94	85.54		34.39																																		4.02	4.02
75-028	75-028_2	Thap Muoi	11	94	94																																				2.12	2.12
75-028	75-028_2	Thap Muoi	12	94	107.16																																				2.22	2.22
75-028	75-028_2	Thap Muoi	13	94	124.08																																				2.32	2.32
75-028	75-028_2	Thap Muoi	14	94	131.6																																				2.43	2.43
75-028	75-028_2	Thap Muoi	15	94	133.48																																				2.57	2.57
75-028	75-028_2	Thap Muoi	16	94	141.94
75-028	75-028_2	Thap Muoi	17	92	143.52
75-028	75-028_3	Thap Muoi	1	204	10.2	0.79																																			0.77	0.77
75-028	75-028_3	Thap Muoi	2	204	18.36	2.55																																			1.39	1.39
75-028	75-028_3	Thap Muoi	3	204	51	9.84																																			1.93	1.93
75-028	75-028_3	Thap Muoi	4	199	85.57	21.05																																			2.46	2.46
75-028	75-028_3	Thap Muoi	5	198	104.94			30.75																																	2.93	2.93
75-028	75-028_3	Thap Muoi	6	198	124.74			38.54																																	3.09	3.09
75-028	75-028_3	Thap Muoi	7	197	135.93			43.36																																	3.19	3.19
75-028	75-028_3	Thap Muoi	8	196	145.04			50.33																																	3.47	3.47
75-028	75-028_3	Thap Muoi	9	196	162.68			60.84																																	3.74	3.74
75-028	75-028_3	Thap Muoi	10	196	178.36																																				2.01	2.01
75-028	75-028_3	Thap Muoi	11	196	196
75-028	75-028_3	Thap Muoi	12	196	223.44
75-028	75-028_3	Thap Muoi	13	196	258.72
75-028	75-028_3	Thap Muoi	14	196	274.4
75-028	75-028_3	Thap Muoi	15	196	278.32
75-028	75-028_3	Thap Muoi	16	196	295.96
75-028	75-028_3	Thap Muoi	17	196	305.76
75-028	75-028_4	Thap Muoi	1	204	10.2	0.79																																			0.77	0.77
75-028	75-028_4	Thap Muoi	2	204	18.36	2.55																																			1.39	1.39
75-028	75-028_4	Thap Muoi	3	198	49.5	9.55																																			1.93	1.93
75-028	75-028_4	Thap Muoi	4	198	85.14	20.94																																			2.46	2.46
75-028	75-028_4	Thap Muoi	5	190	100.7																																				2.93	2.93
75-028	75-028_4	Thap Muoi	6	189	119.07			36.79																																	3.09	3.09
75-028	75-028_4	Thap Muoi	7	189	130.41			41.6																																	3.19	3.19
75-028	75-028_4	Thap Muoi	8	189	139.86			48.53																																	3.47	3.47
75-028	75-028_4	Thap Muoi	9	188	156.04			58.36																																	3.74	3.74
75-028	75-028_4	Thap Muoi	10	188	171.08
75-028	75-028_4	Thap Muoi	11	188	188
75-028	75-028_4	Thap Muoi	12	188	214.32
75-028	75-028_4	Thap Muoi	13	188	248.16
75-028	75-028_4	Thap Muoi	14	188	263.2
75-028	75-028_4	Thap Muoi	15	188	266.96
75-028	75-028_4	Thap Muoi	16	188	283.88
75-028	75-028_4	Thap Muoi	17	188	293.28
75-028	75-028_4	Thap Muoi	18	26	41.6
75-028	75-028_5	Thap Muoi	1	204	10.2	0.79																																			0.77	0.77
75-028	75-028_5	Thap Muoi	2	194	17.46	2.43																																			1.39	1.39
75-028	75-028_5	Thap Muoi	3	189	47.25	9.12																																			1.93	1.93
75-028	75-028_5	Thap Muoi	4	189	81.27	19.99																																			2.46	2.46
75-028	75-028_5	Thap Muoi	5	189	100.17	29.35																																			2.93	2.93
75-028	75-028_5	Thap Muoi	6	189	119.07																																				3.09	3.09
75-028	75-028_5	Thap Muoi	7	189	130.41		41.6																																		3.19	3.19
75-028	75-028_5	Thap Muoi	8	171	126.54		43.91																																		3.47	3.47
75-028	75-028_5	Thap Muoi	9	171	141.93																																				1.87	1.87
75-028	75-028_5	Thap Muoi	10	171	155.61
75-028	75-028_5	Thap Muoi	11	171	171
75-028	75-028_5	Thap Muoi	12	171	194.94
75-028	75-028_5	Thap Muoi	13	171	225.72
75-028	75-028_5	Thap Muoi	14	171	239.4
75-028	75-028_5	Thap Muoi	15	171	242.82
75-028	75-028_5	Thap Muoi	16	149	224.99
75-029	75-029_1	Thap Muoi	1	220	11	0.85																																			0.77	0.77
75-029	75-029_1	Thap Muoi	2	214	19.26	2.68																																			1.39	1.39
75-029	75-029_1	Thap Muoi	3	214	53.5	10.33																																			1.93	1.93
75-029	75-029_1	Thap Muoi	4	214	92.02	22.64																																			2.46	2.46
75-029	75-029_1	Thap Muoi	5	213	112.89		33.08																																		2.93	2.93
75-029	75-029_1	Thap Muoi	6	213	134.19		41.46																																		3.09	3.09
75-029	75-029_1	Thap Muoi	7	212	146.28		46.66																																		3.19	3.19
75-029	75-029_1	Thap Muoi	8	209	154.66
75-029	75-029_1	Thap Muoi	9	208	172.64
75-029	75-029_1	Thap Muoi	10	198	180.18
75-029	75-029_1	Thap Muoi	11	187	187
75-029	75-029_1	Thap Muoi	12	187	213.18
75-029	75-029_1	Thap Muoi	13	187	246.84
75-029	75-029_1	Thap Muoi	14	187	261.8
75-029	75-029_1	Thap Muoi	15	187	265.54
75-029	75-029_1	Thap Muoi	16	187	282.37
75-029	75-029_1	Thap Muoi	17	182	283.92
75-029	75-029_1	Thap Muoi	18	175	280
75-029	75-029_1	Thap Muoi	19	115	194.35
75-029	75-029_1	Thap Muoi	20	62	109.74
75-029	75-029_1	Thap Muoi	21	58	104.98
75-029	75-029_1	Thap Muoi	22	48	89.28
75-029	75-029_1	Thap Muoi	23	43	82.99
75-029	75-029_1	Thap Muoi	24	36	72
75-029	75-029_2	Thap Muoi	1	142	7.1	0.55																																			0.77	0.77
75-029	75-029_2	Thap Muoi	2	138	12.42												1.73																								1.39	1.39
75-029	75-029_2	Thap Muoi	3	134	33.5												6.47																								1.93	1.93
75-029	75-029_2	Thap Muoi	4	133	57.19												14.07																								2.46	2.46
75-029	75-029_2	Thap Muoi	5	118	62.54												18.32																								2.93	2.93
75-029	75-029_2	Thap Muoi	6	111	69.93
75-029	75-029_2	Thap Muoi	7	100	69
75-029	75-029_2	Thap Muoi	8	83	61.42
75-029	75-029_2	Thap Muoi	9	74	61.42
75-029	75-029_2	Thap Muoi	10	62	56.42
75-029	75-029_2	Thap Muoi	11	55	55
75-029	75-029_2	Thap Muoi	12	55	62.7
75-029	75-029_2	Thap Muoi	13	55	72.6
75-029	75-029_2	Thap Muoi	14	55	77
75-029	75-029_2	Thap Muoi	15	55	78.1
75-029	75-029_2	Thap Muoi	16	49	73.99
75-029	75-029_2	Thap Muoi	17	47	73.32
75-029	75-029_2	Thap Muoi	18	47	75.2
75-029	75-029_2	Thap Muoi	19	47	79.43
75-029	75-029_2	Thap Muoi	20	20	35.4
75-029	75-029_3	Thap Muoi	1	204	10.2	0.79																																			0.77	0.77
75-029	75-029_3	Thap Muoi	2	200	18	2.5																																			1.39	1.39
75-029	75-029_3	Thap Muoi	3	200	50	9.65																																			1.93	1.93
75-029	75-029_3	Thap Muoi	4	198	85.14	20.94																																			2.46	2.46
75-029	75-029_3	Thap Muoi	5	198	104.94			30.75																																	2.93	2.93
75-029	75-029_3	Thap Muoi	6	195	122.85			37.96																																	3.09	3.09
75-029	75-029_3	Thap Muoi	7	190	131.1			41.82																																	3.19	3.19
75-029	75-029_3	Thap Muoi	8	190	140.6			48.79																																	3.47	3.47
75-029	75-029_3	Thap Muoi	9	190	157.7			58.98																																	3.74	3.74
75-029	75-029_3	Thap Muoi	10	190	172.9			69.51																																	4.02	4.02
75-029	75-029_3	Thap Muoi	11	190	190			80.37																																	4.23	4.23
75-029	75-029_3	Thap Muoi	12	185	210.9			93.64																																	4.44	4.44
75-029	75-029_3	Thap Muoi	13	185	244.2			113.31																																	4.64	4.64
75-029	75-029_3	Thap Muoi	14	185	259			125.62																																	4.85	4.85
75-029	75-029_3	Thap Muoi	15	120	170.4			87.42																																	5.13	5.13
75-029	75-029_3	Thap Muoi	16	65	98.15			52.41																																	5.34	5.34
75-029	75-029_4	Thap Muoi	1	200	10	0.77																																			0.77	0.77
75-029	75-029_4	Thap Muoi	2	180	16.2	2.25																																			1.39	1.39
75-029	75-029_4	Thap Muoi	3	166	41.5			8.01																																	1.93	1.93
75-029	75-029_4	Thap Muoi	4	166	71.38			17.56																																	2.46	2.46
75-029	75-029_4	Thap Muoi	5	140	74.2			21.74																																	2.93	2.93
75-029	75-029_4	Thap Muoi	6	140	88.2			27.25																																	3.09	3.09
75-029	75-029_4	Thap Muoi	7	138	95.22			30.38																																	3.19	3.19
75-029	75-029_4	Thap Muoi	8	138	102.12			35.44																																	3.47	3.47
75-029	75-029_4	Thap Muoi	9	138	114.54			42.84																																	3.74	3.74
75-029	75-029_4	Thap Muoi	10	138	125.58			50.48																																	4.02	4.02
75-029	75-029_4	Thap Muoi	11	138	138			58.37																																	4.23	4.23
75-029	75-029_4	Thap Muoi	12	138	157.32			69.85																																	4.44	4.44
75-029	75-029_4	Thap Muoi	13	138	182.16			84.52																																	4.64	4.64
75-029	75-029_4	Thap Muoi	14	138	193.2			93.7																																	4.85	4.85
75-029	75-029_4	Thap Muoi	15	138	195.96			100.53																																	5.13	5.13
75-029	75-029_5	Thap Muoi	1	150	7.5	0.58																																			0.77	0.77
75-029	75-029_5	Thap Muoi	2	142	12.78	1.78																																			1.39	1.39
75-029	75-029_5	Thap Muoi	3	140	35	6.76																																			1.93	1.93
75-029	75-029_5	Thap Muoi	4	137	58.91			14.49																																	2.46	2.46
75-029	75-029_5	Thap Muoi	5	127	67.31			19.72																																	2.93	2.93
75-029	75-029_5	Thap Muoi	6	112	70.56			21.8																																	3.09	3.09
75-029	75-029_5	Thap Muoi	7	107	73.83			23.55																																	3.19	3.19
75-029	75-029_5	Thap Muoi	8	102	75.48			26.19																																	3.47	3.47
75-029	75-029_5	Thap Muoi	9	80	66.4			24.83																																	3.74	3.74
75-029	75-029_5	Thap Muoi	10	60	54.6			21.95																																	4.02	4.02
75-029	75-029_5	Thap Muoi	11	50	50			21.15																																	4.23	4.23
75-029	75-029_5	Thap Muoi	12	34	38.76			17.21																																	4.44	4.44
75-029	75-029_5	Thap Muoi	13	34	44.88			20.82																																	4.64	4.64
75-029	75-029_5	Thap Muoi	14	34	47.6			23.09																																	4.85	4.85
75-029	75-029_5	Thap Muoi	15	3	4.26			2.19																																	5.13	5.13
75-030	75-030_1	Thap Muoi	1	207	10.35																			0.8																							3.85	3.85
75-030	75-030_1	Thap Muoi	2	203	18.27																			2.54																							6.95	6.95
75-030	75-030_1	Thap Muoi	3	202	50.5																			9.75																							9.65	9.65
75-030	75-030_1	Thap Muoi	4	199	85.57
75-030	75-030_1	Thap Muoi	5	196	103.88
75-030	75-030_1	Thap Muoi	6	195	122.85
75-030	75-030_1	Thap Muoi	7	190	131.1
75-030	75-030_1	Thap Muoi	8	190	140.6
75-030	75-030_1	Thap Muoi	9	189	156.87
75-030	75-030_1	Thap Muoi	10	189	171.99
75-030	75-030_1	Thap Muoi	11	188	188
75-030	75-030_1	Thap Muoi	12	188	214.32
75-030	75-030_1	Thap Muoi	13	188	248.16
75-030	75-030_1	Thap Muoi	14	188	263.2
75-030	75-030_1	Thap Muoi	15	188	266.96
75-030	75-030_1	Thap Muoi	16	188	283.88
75-030	75-030_1	Thap Muoi	17	178	277.68
75-030	75-030_1	Thap Muoi	18	166	265.6
75-030	75-030_1	Thap Muoi	19	124	209.56
75-030	75-030_1	Thap Muoi	20	121	214.17
75-030	75-030_1	Thap Muoi	21	84	152.04
75-030	75-030_1	Thap Muoi	22	44	81.84
75-030	75-030_1	Thap Muoi	23	30	57.9
75-030	75-030_2	Thap Muoi	1	204	10.2																			0.79																							3.85	3.85
75-030	75-030_2	Thap Muoi	2	192	17.28																			2.4																							6.95	6.95
75-030	75-030_2	Thap Muoi	3	190	47.5																			9.17																							9.65	9.65
75-030	75-030_2	Thap Muoi	4	189	81.27																			19.99																							12.3	12.3
75-030	75-030_2	Thap Muoi	5	189	100.17																			29.35																							14.65	14.65
75-030	75-030_2	Thap Muoi	6	188	118.44
75-030	75-030_2	Thap Muoi	7	187	129.03
75-030	75-030_2	Thap Muoi	8	186	137.64																			47.76																							17.35	17.35
75-030	75-030_2	Thap Muoi	9	186	154.38																			57.74																							18.7	18.7
75-030	75-030_2	Thap Muoi	10	186	169.26
75-030	75-030_2	Thap Muoi	11	186	186
75-030	75-030_2	Thap Muoi	12	186	212.04
75-030	75-030_2	Thap Muoi	13	186	245.52
75-030	75-030_2	Thap Muoi	14	185	259
75-030	75-030_2	Thap Muoi	15	185	262.7
75-030	75-030_2	Thap Muoi	16	185	279.35
75-030	75-030_2	Thap Muoi	17	185	288.6
75-030	75-030_2	Thap Muoi	18	128	204.8
75-030	75-030_2	Thap Muoi	19	104	175.76
75-030	75-030_2	Thap Muoi	20	27	47.79
75-030	75-030_2	Thap Muoi	21	12	21.72
75-030	75-030_3	Thap Muoi	1	255	12.75																			0.98																							3.85	3.85
75-030	75-030_3	Thap Muoi	2	250	22.5																			3.13																							6.95	6.95
75-030	75-030_3	Thap Muoi	3	243	60.75																			11.72																							9.65	9.65
75-030	75-030_3	Thap Muoi	4	243	104.49																			25.7																							12.3	12.3
75-030	75-030_3	Thap Muoi	5	242	128.26																																										7.33	7.33
75-030	75-030_3	Thap Muoi	6	241	151.83
75-030	75-030_3	Thap Muoi	7	241	166.29
75-030	75-030_3	Thap Muoi	8	239	176.86
75-030	75-030_3	Thap Muoi	9	236	195.88
75-030	75-030_3	Thap Muoi	10	236	214.76
75-030	75-030_3	Thap Muoi	11	235	235
75-030	75-030_3	Thap Muoi	12	235	267.9
75-030	75-030_3	Thap Muoi	13	234	308.88
75-030	75-030_3	Thap Muoi	14	234	327.6
75-030	75-030_3	Thap Muoi	15	227	322.34
75-030	75-030_3	Thap Muoi	16	197	297.47
75-030	75-030_3	Thap Muoi	17	194	302.64
75-030	75-030_3	Thap Muoi	18	191	305.6
75-030	75-030_3	Thap Muoi	19	159	268.71
75-030	75-030_3	Thap Muoi	20	89	157.53
75-030	75-030_3	Thap Muoi	21	57	103.17
75-030	75-030_3	Thap Muoi	22	18	33.48
75-030	75-030_4	Thap Muoi	1	202	10.1	0.78																																			0.77	0.77
75-030	75-030_4	Thap Muoi	2	198	17.82	2.48																																			1.39	1.39
75-030	75-030_4	Thap Muoi	3	198	49.5	9.55																																			1.93	1.93
75-030	75-030_4	Thap Muoi	4	198	85.14																																				2.46	2.46
75-030	75-030_4	Thap Muoi	5	197	104.41																																				2.93	2.93
75-030	75-030_4	Thap Muoi	6	175	110.25																																				3.09	3.09
75-030	75-030_4	Thap Muoi	7	173	119.37			38.08																																	3.19	3.19
75-030	75-030_4	Thap Muoi	8	173	128.02																																				1.74	1.74
75-030	75-030_4	Thap Muoi	9	173	143.59
75-030	75-030_4	Thap Muoi	10	173	157.43
75-030	75-030_4	Thap Muoi	11	173	173
75-030	75-030_4	Thap Muoi	12	172	196.08
75-030	75-030_4	Thap Muoi	13	171	225.72
75-030	75-030_4	Thap Muoi	14	169	236.6
75-030	75-030_4	Thap Muoi	15	169	239.98
75-030	75-030_4	Thap Muoi	16	169	255.19
75-030	75-030_4	Thap Muoi	17	166	258.96
75-030	75-030_4	Thap Muoi	18	50	80
75-030	75-030_4	Thap Muoi	19	46	77.74
75-031	75-031_1	Thap Muoi	1	400	20	1.54																																			0.77	0.77
75-031	75-031_1	Thap Muoi	2	398	35.82	4.98																																			1.39	1.39
75-031	75-031_1	Thap Muoi	3	390	97.5	18.82																																			1.93	1.93
75-031	75-031_1	Thap Muoi	4	388	166.84			41.04																																	2.46	2.46
75-031	75-031_1	Thap Muoi	5	388	205.64			60.25																																	2.93	2.93
75-031	75-031_1	Thap Muoi	6	388	244.44			75.53																																	3.09	3.09
75-031	75-031_1	Thap Muoi	7	388	267.72			85.4																																	3.19	3.19
75-031	75-031_1	Thap Muoi	8	290	214.6			74.47																																	3.47	3.47
75-031	75-031_1	Thap Muoi	9	290	240.7			90.02																																	3.74	3.74
75-031	75-031_1	Thap Muoi	10	280	254.8			102.43																																	4.02	4.02
75-031	75-031_1	Thap Muoi	11	280	280			118.44																																	4.23	4.23
75-031	75-031_1	Thap Muoi	12	280	319.2			141.72																																	4.44	4.44
75-031	75-031_1	Thap Muoi	13	130	171.6			79.62																																	4.64	4.64
75-031	75-031_1	Thap Muoi	14	90	126			61.11																																	4.85	4.85
75-031	75-031_1	Thap Muoi	15	80	113.6			58.28																																	5.13	5.13
75-031	75-031_2	Thap Muoi	1	300	15	1.16																																			0.77	0.77
75-031	75-031_2	Thap Muoi	2	300	27	3.75																																			1.39	1.39
75-031	75-031_2	Thap Muoi	3	300	75	14.48																																			1.93	1.93
75-031	75-031_2	Thap Muoi	4	298	128.14			31.52																																	2.46	2.46
75-031	75-031_2	Thap Muoi	5	298	157.94			46.28																																	2.93	2.93
75-031	75-031_2	Thap Muoi	6	298	187.74			58.01																																	3.09	3.09
75-031	75-031_2	Thap Muoi	7	298	205.62			65.59																																	3.19	3.19
75-031	75-031_2	Thap Muoi	8	298	220.52																																				1.74	1.74
75-031	75-031_2	Thap Muoi	9	298	247.34																																				1.87	1.87
75-031	75-031_2	Thap Muoi	10	298	271.18																																				2.01	2.01
75-031	75-031_2	Thap Muoi	11	298	298																																				2.12	2.12
75-031	75-031_2	Thap Muoi	12	298	339.72																																				2.22	2.22
75-031	75-031_2	Thap Muoi	13	150	198																																				2.32	2.32
75-031	75-031_2	Thap Muoi	14	150	210
75-031	75-031_2	Thap Muoi	15	30	42.6
75-031	75-031_2	Thap Muoi	16	30	45.3
75-031	75-031_2	Thap Muoi	17	30	46.8
75-031	75-031_2	Thap Muoi	18	30	48
75-031	75-031_3	Thap Muoi	1	200	10	0.77																																			0.77	0.77
75-031	75-031_3	Thap Muoi	2	200	18	2.5																																			1.39	1.39
75-031	75-031_3	Thap Muoi	3	200	50	9.65																																			1.93	1.93
75-031	75-031_3	Thap Muoi	4	200	86																																				2.46	2.46
75-031	75-031_3	Thap Muoi	5	200	106			31.06																																	2.93	2.93
75-031	75-031_3	Thap Muoi	6	192	120.96			37.38																																	3.09	3.09
75-031	75-031_3	Thap Muoi	7	190	131.1			41.82																																	3.19	3.19
75-031	75-031_3	Thap Muoi	8	190	140.6			48.79																																	3.47	3.47
75-031	75-031_3	Thap Muoi	9	190	157.7			58.98																																	3.74	3.74
75-031	75-031_3	Thap Muoi	10	190	172.9			69.51																																	4.02	4.02
75-031	75-031_3	Thap Muoi	11	190	190			80.37																																	4.23	4.23
75-031	75-031_3	Thap Muoi	12	180	205.2			91.11																																	4.44	4.44
75-031	75-031_3	Thap Muoi	13	180	237.6			110.25																																	4.64	4.64
75-031	75-031_3	Thap Muoi	14	170	238			115.43																																	4.85	4.85
75-031	75-031_3	Thap Muoi	15	170	241.4			123.84																																	5.13	5.13
75-031	75-031_3	Thap Muoi	16	170	256.7			137.08																																	5.34	5.34
75-031	75-031_3	Thap Muoi	17	170	265.2			145.06																																	5.47	5.47
75-031	75-031_3	Thap Muoi	18	170	272			152.59																																	5.61	5.61
75-032	75-032_1	Thap Muoi	1	550	27.5																									4.24												0.77						3.85
75-032	75-032_1	Thap Muoi	2	542	48.78																									13.56												1.39						6.95
75-032	75-032_1	Thap Muoi	3	538	134.5																									51.92												1.93						9.65
75-032	75-032_1	Thap Muoi	4	538	231.34																									113.82												2.46						12.3
75-032	75-032_1	Thap Muoi	5	538	285.14																									167.09												2.93						14.65
75-032	75-032_1	Thap Muoi	6	536	337.68
75-032	75-032_1	Thap Muoi	7	534	368.46
75-032	75-032_1	Thap Muoi	8	532	393.68
75-032	75-032_1	Thap Muoi	9	382	317.06
75-032	75-032_1	Thap Muoi	10	232	211.12
75-032	75-032_1	Thap Muoi	11	22	22
75-032	75-032_1	Thap Muoi	12	22	25.08
75-032	75-032_1	Thap Muoi	13	22	29.04
75-032	75-032_1	Thap Muoi	14	22	30.8
75-032	75-032_1	Thap Muoi	15	22	31.24
75-032	75-032_1	Thap Muoi	16	22	33.22
75-032	75-032_1	Thap Muoi	17	22	34.32
75-033	75-033_1	Thap Muoi	1	102	5.1	0.39																																			0.77	0.77
75-033	75-033_1	Thap Muoi	2	97	8.73	1.21																																			1.39	1.39
75-033	75-033_1	Thap Muoi	3	90	22.5	4.34																																			1.93	1.93
75-033	75-033_1	Thap Muoi	4	90	38.7	9.52																																			2.46	2.46
75-033	75-033_1	Thap Muoi	5	90	47.7			13.98																																	2.93	2.93
75-033	75-033_1	Thap Muoi	6	86	54.18			16.74																																	3.09	3.09
75-033	75-033_1	Thap Muoi	7	86	59.34
75-033	75-033_1	Thap Muoi	8	86	63.64
75-033	75-033_1	Thap Muoi	9	86	71.38
75-033	75-033_1	Thap Muoi	10	86	78.26
75-033	75-033_1	Thap Muoi	11	86	86
75-033	75-033_1	Thap Muoi	12	86	98.04
75-033	75-033_1	Thap Muoi	13	76	100.32
75-033	75-033_1	Thap Muoi	14	40	56
75-033	75-033_1	Thap Muoi	15	10	14.2
75-033	75-033_2	Thap Muoi	1	110	5.5	0.42																																			0.77	0.77
75-033	75-033_2	Thap Muoi	2	110	9.9	1.38																																			1.39	1.39
75-033	75-033_2	Thap Muoi	3	110	27.5	5.31																																			1.93	1.93
75-033	75-033_2	Thap Muoi	4	110	47.3	11.64																																			2.46	2.46
75-033	75-033_2	Thap Muoi	5	110	58.3			17.08																																	2.93	2.93
75-033	75-033_2	Thap Muoi	6	110	69.3			21.41																																	3.09	3.09
75-033	75-033_2	Thap Muoi	7	106	73.14			23.33																																	3.19	3.19
75-033	75-033_2	Thap Muoi	8	106	78.44																																				1.74	1.74
75-033	75-033_2	Thap Muoi	9	106	87.98																																				1.87	1.87
75-033	75-033_2	Thap Muoi	10	100	91			36.58																																	4.02	4.02
75-033	75-033_2	Thap Muoi	11	100	100			42.3																																	4.23	4.23
75-033	75-033_2	Thap Muoi	12	100	114			50.62																																	4.44	4.44
75-033	75-033_2	Thap Muoi	13	95	125.4			58.19																																	4.64	4.64
75-033	75-033_2	Thap Muoi	14	75	105			50.93																																	4.85	4.85
75-033	75-033_2	Thap Muoi	15	69	97.98																																				2.57	2.57
75-033	75-033_2	Thap Muoi	16	46	69.46																																				2.67	2.67
75-033	75-033_2	Thap Muoi	17	26	40.56
75-033	75-033_3	Thap Muoi	1	150	7.5	0.58																																			0.77	0.77
75-033	75-033_3	Thap Muoi	2	150	13.5	1.88																																			1.39	1.39
75-033	75-033_3	Thap Muoi	3	150	37.5	7.24																																			1.93	1.93
75-033	75-033_3	Thap Muoi	4	150	64.5			15.87																																	2.46	2.46
75-033	75-033_3	Thap Muoi	5	150	79.5			23.29																																	2.93	2.93
75-033	75-033_3	Thap Muoi	6	150	94.5			29.2																																	3.09	3.09
75-033	75-033_3	Thap Muoi	7	150	103.5			33.02																																	3.19	3.19
75-033	75-033_3	Thap Muoi	8	100	74			25.68																																	3.47	3.47
75-033	75-033_3	Thap Muoi	9	90	74.7			27.94																																	3.74	3.74
75-033	75-033_3	Thap Muoi	10	90	81.9																																				2.01	2.01
75-033	75-033_3	Thap Muoi	11	90	90																																				2.12	2.12
75-033	75-033_3	Thap Muoi	12	90	102.6																																				2.22	2.22
75-033	75-033_3	Thap Muoi	13	90	118.8
75-033	75-033_3	Thap Muoi	14	62	86.8
75-033	75-033_3	Thap Muoi	15	44	62.48
75-033	75-033_3	Thap Muoi	16	12	18.12
75-033	75-033_4	Thap Muoi	1	100	5	0.39																																			0.77	0.77
75-033	75-033_4	Thap Muoi	2	100	9	1.25																																			1.39	1.39
75-033	75-033_4	Thap Muoi	3	100	25	4.83																																			1.93	1.93
75-033	75-033_4	Thap Muoi	4	100	43	10.58																																			2.46	2.46
75-033	75-033_4	Thap Muoi	5	96	50.88	14.91																																			2.93	2.93
75-033	75-033_4	Thap Muoi	6	80	50.4			15.57																																	3.09	3.09
75-033	75-033_4	Thap Muoi	7	80	55.2			17.61																																	3.19	3.19
75-033	75-033_4	Thap Muoi	8	80	59.2			20.54																																	3.47	3.47
75-033	75-033_4	Thap Muoi	9	80	66.4			24.83																																	3.74	3.74
75-033	75-033_4	Thap Muoi	10	80	72.8																																				2.01	2.01
75-033	75-033_4	Thap Muoi	11	80	80																																				2.12	2.12
75-033	75-033_4	Thap Muoi	12	80	91.2																																				2.22	2.22
75-033	75-033_4	Thap Muoi	13	42	55.44																																				2.32	2.32
75-033	75-033_4	Thap Muoi	14	39	54.6																																				2.43	2.43
75-033	75-033_4	Thap Muoi	15	19	26.98																																				2.57	2.57
75-033	75-033_5	Thap Muoi	1	102	5.1	0.39																																			0.77	0.77
75-033	75-033_5	Thap Muoi	2	102	9.18	1.28																																			1.39	1.39
75-033	75-033_5	Thap Muoi	3	102	25.5	4.92																																			1.93	1.93
75-033	75-033_5	Thap Muoi	4	102	43.86	10.79																																			2.46	2.46
75-033	75-033_5	Thap Muoi	5	102	54.06																																				2.93	2.93
75-033	75-033_5	Thap Muoi	6	102	64.26			19.86																																	3.09	3.09
75-033	75-033_5	Thap Muoi	7	102	70.38			22.45																																	3.19	3.19
75-033	75-033_5	Thap Muoi	8	102	75.48			26.19																																	3.47	3.47
75-033	75-033_5	Thap Muoi	9	100	83																																				1.87	1.87
75-033	75-033_5	Thap Muoi	10	97	88.27
75-033	75-033_5	Thap Muoi	11	95	95
75-033	75-033_5	Thap Muoi	12	95	108.3
75-033	75-033_5	Thap Muoi	13	95	125.4
75-033	75-033_5	Thap Muoi	14	75	105
75-033	75-033_5	Thap Muoi	15	48	68.16
75-033	75-033_5	Thap Muoi	16	25	37.75																																				2.67	2.67
75-033	75-033_6	Thap Muoi	1	153	7.65	0.59																																			0.77	0.77
75-033	75-033_6	Thap Muoi	2	152	13.68	1.9																																			1.39	1.39
75-033	75-033_6	Thap Muoi	3	152	38	7.33																																			1.93	1.93
75-033	75-033_6	Thap Muoi	4	150	64.5			15.87																																	2.46	2.46
75-033	75-033_6	Thap Muoi	5	115	60.95			17.86																																	2.93	2.93
75-033	75-033_6	Thap Muoi	6	115	72.45			22.39																																	3.09	3.09
75-033	75-033_6	Thap Muoi	7	115	79.35			25.31																																	3.19	3.19
75-033	75-033_6	Thap Muoi	8	115	85.1																																				1.74	1.74
75-033	75-033_6	Thap Muoi	9	115	95.45
75-033	75-033_6	Thap Muoi	10	115	104.65
75-033	75-033_6	Thap Muoi	11	115	115
75-033	75-033_6	Thap Muoi	12	115	131.1
75-033	75-033_6	Thap Muoi	13	115	151.8
75-033	75-033_6	Thap Muoi	14	7	9.8
75-034	75-034_1	Thap Muoi	1	500	25																							3.85														0.77						3.85
75-034	75-034_1	Thap Muoi	2	475	42.75																							11.88														1.39						6.95
75-034	75-034_1	Thap Muoi	3	470	117.5																							45.36														1.93						9.65
75-034	75-034_1	Thap Muoi	4	449	193.07																							94.99														2.46						12.3
75-034	75-034_1	Thap Muoi	5	420	222.6																								65.22												2.93	2.93
75-034	75-034_1	Thap Muoi	6	420	264.6																								81.76												3.09	3.09
75-034	75-034_1	Thap Muoi	7	420	289.8																								92.45												3.19	3.19
75-034	75-034_1	Thap Muoi	8	420	310.8																								107.85												3.47	3.47
75-034	75-034_1	Thap Muoi	9	420	348.6																								130.38												3.74	3.74
75-034	75-034_1	Thap Muoi	10	420	382.2																								153.64												4.02	4.02
75-034	75-034_1	Thap Muoi	11	420	420																								177.66												4.23	4.23
75-034	75-034_1	Thap Muoi	12	420	478.8																								212.59												4.44	4.44
75-034	75-034_1	Thap Muoi	13	420	554.4																								257.24												4.64	4.64
75-034	75-034_1	Thap Muoi	14	420	588																								285.18												4.85	4.85
75-034	75-034_1	Thap Muoi	15	340	482.8																								247.68												5.13	5.13
75-034	75-034_1	Thap Muoi	16	260	392.6																								209.65												5.34	5.34
75-034	75-034_1	Thap Muoi	17	180	280.8																								153.6												5.47	5.47
75-034	75-034_1	Thap Muoi	18	100	160																								89.76												5.61	5.61
75-034	75-034_1	Thap Muoi	19	80	135.2																								76.79												5.68	5.68
75-034	75-034_1	Thap Muoi	20	50	88.5																								52.13												5.89	5.89
75-035	75-035_1	Thap Muoi	1	300	15																							2.31														0.77						3.85
75-035	75-035_1	Thap Muoi	2	292	26.28																							7.31														1.39						6.95
75-035	75-035_1	Thap Muoi	3	292	73																							28.18														1.93						9.65
75-035	75-035_1	Thap Muoi	4	292	125.56																								30.89												2.46	2.46
75-035	75-035_1	Thap Muoi	5	292	154.76																								45.34												2.93	2.93
75-035	75-035_1	Thap Muoi	6	292	183.96																								56.84												3.09	3.09
75-035	75-035_1	Thap Muoi	7	290	200.1
75-035	75-035_1	Thap Muoi	8	288	213.12
75-035	75-035_1	Thap Muoi	9	288	239.04																								89.4												3.74	3.74
75-035	75-035_1	Thap Muoi	10	288	262.08																								105.36												4.02	4.02
75-035	75-035_1	Thap Muoi	11	288	288																								121.82												4.23	4.23
75-035	75-035_1	Thap Muoi	12	288	328.32																								145.77												4.44	4.44
75-035	75-035_1	Thap Muoi	13	288	380.16																								176.39												4.64	4.64
75-035	75-035_1	Thap Muoi	14	288	403.2																								195.55												4.85	4.85
75-035	75-035_1	Thap Muoi	15	228	323.76																								166.09												5.13	5.13
75-035	75-035_1	Thap Muoi	16	115	173.65																								92.73												5.34	5.34
75-035	75-035_1	Thap Muoi	17	80	124.8																								68.27												5.47	5.47
75-035	75-035_1	Thap Muoi	18	75	120																								67.32												5.61	5.61
75-035	75-035_1	Thap Muoi	19	75	126.75																								71.99												5.68	5.68
75-035	75-035_1	Thap Muoi	20	65	115.05																								67.76												5.89	5.89
75-035	75-035_1	Thap Muoi	21	65	117.65																								77.41												6.58	6.58
75-035	75-035_1	Thap Muoi	22	65	120.9																								88.02												7.28	7.28
75-035	75-035_1	Thap Muoi	23	55	106.15																								80.14												7.55	7.55
75-035	75-035_1	Thap Muoi	24	40	80																								60.96												7.62	7.62
75-035	75-035_1	Thap Muoi	25	20	42																								32												7.62	7.62
75-036	75-036_1	Thap Muoi	1	300	15																							2.31														0.77						3.85
75-036	75-036_1	Thap Muoi	2	298	26.82																							7.46														1.39						6.95
75-036	75-036_1	Thap Muoi	3	295	73.75																							28.47														1.93						9.65
75-036	75-036_1	Thap Muoi	4	292	125.56																							61.78														2.46						12.3
75-036	75-036_1	Thap Muoi	5	284	150.52																								44.1												2.93	2.93
75-036	75-036_1	Thap Muoi	6	284	178.92																								55.29												3.09	3.09
75-036	75-036_1	Thap Muoi	7	284	195.96																								62.51												3.19	3.19
75-036	75-036_1	Thap Muoi	8	284	210.16																								72.93												3.47	3.47
75-036	75-036_1	Thap Muoi	9	284	235.72																								88.16												3.74	3.74
75-036	75-036_1	Thap Muoi	10	284	258.44																								103.89												4.02	4.02
75-036	75-036_1	Thap Muoi	11	280	280																								118.44												4.23	4.23
75-036	75-036_1	Thap Muoi	12	280	319.2																								141.72												4.44	4.44
75-036	75-036_1	Thap Muoi	13	280	369.6																								171.49												4.64	4.64
75-036	75-036_1	Thap Muoi	14	280	392																								190.12												4.85	4.85
75-036	75-036_1	Thap Muoi	15	275	390.5																								200.33												5.13	5.13
75-036	75-036_1	Thap Muoi	16	275	415.25																								221.74												5.34	5.34
75-036	75-036_1	Thap Muoi	17	210	327.6																								179.2												5.47	5.47
75-036	75-036_1	Thap Muoi	18	160	256																								143.62												5.61	5.61
75-036	75-036_1	Thap Muoi	19	105	177.45																								100.79												5.68	5.68
75-037	75-037_1	Thap Muoi	1	400	20	1.54																																			0.77	0.77
75-037	75-037_1	Thap Muoi	2	385	34.65	4.82																																			1.39	1.39
75-037	75-037_1	Thap Muoi	3	380	95	18.34																																			1.93	1.93
75-038	75-038_1	Thap Muoi	1	408	20.4	1.57																																			0.77	0.77
75-038	75-038_1	Thap Muoi	2	405	36.45	5.07																																			1.39	1.39
75-038	75-038_1	Thap Muoi	3	400	100	19.3																																			1.93	1.93
75-038	75-038_1	Thap Muoi	4	400	172	42.31																																			2.46	2.46
75-038	75-038_1	Thap Muoi	5	400	212			62.12																																	2.93	2.93
75-038	75-038_1	Thap Muoi	6	400	252			77.87																																	3.09	3.09
75-038	75-038_1	Thap Muoi	7	400	276			88.04																																	3.19	3.19
75-038	75-038_1	Thap Muoi	8	400	296			102.71																																	3.47	3.47
75-038	75-038_1	Thap Muoi	9	400	332			124.17																																	3.74	3.74
75-038	75-038_1	Thap Muoi	10	400	364			146.33																																	4.02	4.02
75-038	75-038_1	Thap Muoi	11	400	400			169.2																																	4.23	4.23
75-038	75-038_1	Thap Muoi	12	373	425.22
75-038	75-038_1	Thap Muoi	13	373	492.36
75-038	75-038_1	Thap Muoi	14	373	522.2
75-038	75-038_1	Thap Muoi	15	373	529.66
75-038	75-038_1	Thap Muoi	16	373	563.23
75-038	75-038_1	Thap Muoi	17	373	581.88
75-038	75-038_1	Thap Muoi	18	198	316.8
75-038	75-038_1	Thap Muoi	19	118	199.42
75-039	75-039_1	Thap Muoi	1	300	15	1.16																																			0.77	0.77
75-039	75-039_1	Thap Muoi	2	270	24.3	3.38																																			1.39	1.39
75-039	75-039_1	Thap Muoi	3	265	66.25	12.79																																			1.93	1.93
75-039	75-039_1	Thap Muoi	4	265	113.95			28.03																																	2.46	2.46
75-039	75-039_1	Thap Muoi	5	260	137.8			40.38																																	2.93	2.93
75-039	75-039_1	Thap Muoi	6	250	157.5			48.67																																	3.09	3.09
75-039	75-039_1	Thap Muoi	7	250	172.5			55.03																																	3.19	3.19
75-039	75-039_1	Thap Muoi	8	250	185			64.2																																	3.47	3.47
75-039	75-039_1	Thap Muoi	9	248	205.84			76.98																																	3.74	3.74
75-039	75-039_1	Thap Muoi	10	247	224.77			90.36																																	4.02	4.02
75-039	75-039_1	Thap Muoi	11	246	246			104.06																																	4.23	4.23
75-039	75-039_1	Thap Muoi	12	246	280.44			124.52																																	4.44	4.44
75-039	75-039_1	Thap Muoi	13	240	316.8			147																																	4.64	4.64
75-039	75-039_1	Thap Muoi	14	240	336			162.96																																	4.85	4.85
75-039	75-039_1	Thap Muoi	15	240	340.8			174.83																																	5.13	5.13
75-039	75-039_1	Thap Muoi	16	200	302			161.27																																	5.34	5.34
75-039	75-039_1	Thap Muoi	17	185	288.6			157.86																																	5.47	5.47
75-039	75-039_1	Thap Muoi	18	180	288			161.57																																	5.61	5.61
75-039	75-039_1	Thap Muoi	19	40	67.6
75-039	75-039_2	Thap Muoi	1	300	15	1.16																																			0.77	0.77
75-039	75-039_2	Thap Muoi	2	290	26.1	3.63																																			1.39	1.39
75-039	75-039_2	Thap Muoi	3	285	71.25	13.75																																			1.93	1.93
75-039	75-039_2	Thap Muoi	4	285	122.55			30.15																																	2.46	2.46
75-039	75-039_2	Thap Muoi	5	270	143.1			41.93																																	2.93	2.93
75-039	75-039_2	Thap Muoi	6	260	163.8			50.61																																	3.09	3.09
75-039	75-039_2	Thap Muoi	7	255	175.95			56.13																																	3.19	3.19
75-039	75-039_2	Thap Muoi	8	255	188.7			65.48																																	3.47	3.47
75-039	75-039_2	Thap Muoi	9	255	211.65			79.16																																	3.74	3.74
75-039	75-039_2	Thap Muoi	10	190	172.9			69.51																																	4.02	4.02
75-039	75-039_2	Thap Muoi	11	150	150			63.45																																	4.23	4.23
75-039	75-039_2	Thap Muoi	12	135	153.9			68.33																																	4.44	4.44
75-039	75-039_2	Thap Muoi	13	130	171.6			79.62																																	4.64	4.64
75-039	75-039_2	Thap Muoi	14	121	169.4			82.16																																	4.85	4.85
[truncated: 4,042 more rows]
[truncated: 7 more columns]
